# Supplementary material for: Discovery of rigid biphenyl Plasmodium falciparum DHFR inhibitors using a fragment linking strategy
Source: Royal Society of Chemistry journal article supplement (doi:10.1039/d3md00242j), 2023-01-01
Supplement: d3md00242j1.pdf [file d3md00242j1.pdf]

## Supplementary Materials

**Table S1.** Fragment hits obtained from QM *Pf*DHFR screen,  $\Delta T_m$  and inhibition results.

| Structure                                                                                                      | Fragment | Screen   | $\Delta T_m$ (°C)                    | QM <i>Pf</i> DHFR inhibition at 500 $\mu$ M (%) | QM <i>Pf</i> DHFR IC <sub>50</sub> (mM) | WT <i>Pf</i> DHFR inhibition at 500 $\mu$ M (%) | WT <i>Pf</i> DHFR IC <sub>50</sub> (mM) | <i>Hs</i> DHFR inhibition at 500 $\mu$ M (%) |
|----------------------------------------------------------------------------------------------------------------|----------|----------|--------------------------------------|-------------------------------------------------|-----------------------------------------|-------------------------------------------------|-----------------------------------------|----------------------------------------------|
| 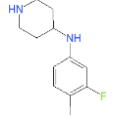                              | 002      | QM-NADPH | 1.3±0.3                              | 4.1±2.5                                         | >2                                      | 32.4±2.2                                        | 0.7±0.04                                | 1.7 ± 1.5                                    |
|                               | 101      | QM-NADPH | ND                                   | 7.7±3.2                                         |                                         | 6.5±1.3                                         |                                         |                                              |
|                               | 136      | QM-NADPH | 0.8±0.3                              | 19.5±5.2                                        | 2.2±0.1                                 |                                                 |                                         |                                              |
|                              | 205      | Both     | 1.33±0.3 (NADPH),<br>4.3±1.5 (Apo)   | 4.6±7.6                                         | 4.5±0.8                                 | 81.1±3.1                                        | 0.2±0.02                                |                                              |
|                             | 218      | QM-NADPH | 1.0±0                                | 10.9±2.6                                        | 5.4±0.6                                 | 43.4±4.2                                        | 0.9±0.3                                 |                                              |
| <br><small>racemate</small> | 273      | QM-NADPH | -0.8±0.6                             | 9.9±6.3                                         |                                         | 20.4±5.5                                        | 4.3±0.3                                 |                                              |
|                             | 362      | QM-NADPH | -0.8±0.3                             | 3.3±3.7                                         |                                         | 3.9±0.9                                         |                                         | 2.3 ± 2.0                                    |
|                             | 363      | QM-NADPH | -1.3±0.3                             | 2.1±2.1                                         |                                         | 1.1±4.6                                         |                                         |                                              |
|                             | 753      | QM-NADPH | -2.3±1.1                             | 23.1±3.3                                        |                                         | 27.4±13.1                                       | 0.9±0.01                                |                                              |
|                             | 935      | Both     | -1.5±0.5 (NADPH), -<br>1.8±1.5 (Apo) | 1.3±4.4                                         |                                         |                                                 |                                         |                                              |

|                                                                                                 |             |          |                                    |           |          |          |          |          |
|-------------------------------------------------------------------------------------------------|-------------|----------|------------------------------------|-----------|----------|----------|----------|----------|
| 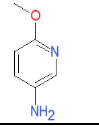               | <b>976</b>  | QM-NADPH | n.d.                               | 5.3±2.8   |          |          |          |          |
|                | <b>1136</b> | Both     | -0.75±0.9 (NADPH),<br>3.8±0.6(apo) | 12.2±3.3  | >2       |          |          |          |
|                | <b>1150</b> | QM-NADPH | -1.8±0.6                           | 10.2±5.8  |          |          |          |          |
|                | <b>066</b>  | QM       | -1.5 ±0.9                          | 17.8±9.4  | 0.9±0.1  |          |          | 5.4±5.4  |
|                | <b>163</b>  | QM       | 1.8±0.3                            | 16.3±4.4  |          | 2.3±9.3  |          |          |
|                | <b>173</b>  | QM       | -1.2±1.3                           | 12.2±2.0  |          |          |          |          |
|              | <b>464</b>  | QM       | -2.2±0.8                           | 41.7±12.9 | 0.6±0.02 | 27.5±6.8 | 0.6±0.04 | 17.3±8.7 |
|              | <b>626</b>  | QM       | -1.2±0.6                           | 7.0±2.3   | 1.0±0.1  |          |          |          |
|              | <b>1002</b> | QM       | 3.7±0.6                            | 5.0±3.5   | >2       |          |          |          |
|              | <b>1078</b> | QM       | 1.2±0.3                            | 12.1±7.9  | 0.9±0.02 | 6.8±2.0  |          | 14.5±4.5 |
|              | <b>1122</b> | QM       | -1.8±0.8                           | 2.6±8.3   |          |          |          |          |
| <br>racemate | <b>1158</b> | QM       | -1.2±1.5                           | 7.5±12.6  | >2       |          |          |          |

QM: quadruple mutant (N51I + C59R + S108N + I164L).

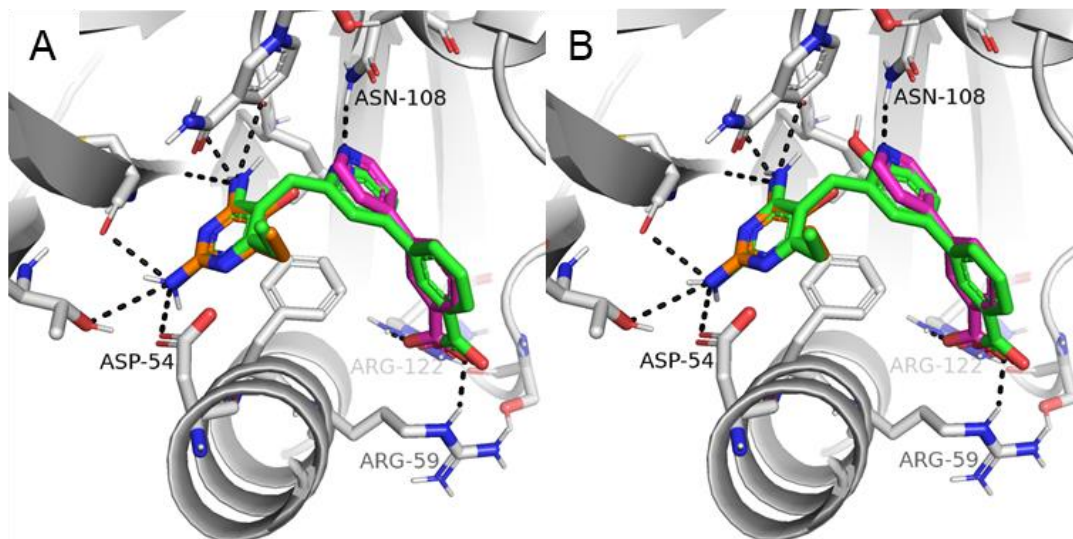

**Figure S1.** Molecular docking results and binding mode schematic representation for test 4 (**A**), test 5 (**B**) in the active site of QM *PfDHFR* (PDB 4DP3). Molecular docking results for **L4** and **136** appear in orange and magenta, respectively, and polar contacts appear as black dashed lines.

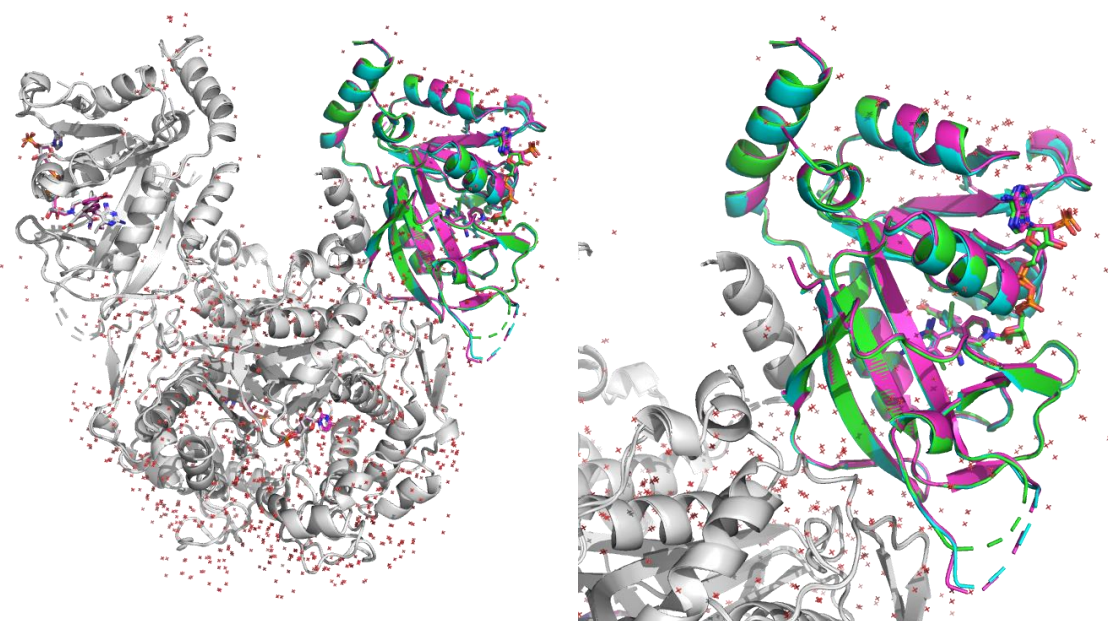

**Figure S2.** Superimposition of crystal structures of compounds **4** (magenta, PDB 8JFB), **6** (cyan, PDB 8JFC) and **8** (green, PDB 8JFD). *PfDHFR* chain A appears in colour, *PfDHFR* chain B and TS domains appear in grey for clarity.

**Table S2.** Data collection and refinement statistics of the ternary complexes of *Pf*DHFR-TS V1/S.

|                                                    | <b>4 (B21588)</b>                                     | <b>6 (B21591)</b>                                     | <b>8 (B21594)</b>                                     |
|----------------------------------------------------|-------------------------------------------------------|-------------------------------------------------------|-------------------------------------------------------|
| PDB ID code                                        | 8JFB                                                  | 8JFC                                                  | 8JFD                                                  |
| <i>Data collection</i>                             |                                                       |                                                       |                                                       |
| wavelength (Å)                                     | 1.5418                                                | 1.5418                                                | 1.5418                                                |
| space group                                        | <i>P</i> 2 <sub>1</sub> 2 <sub>1</sub> 2 <sub>1</sub> | <i>P</i> 2 <sub>1</sub> 2 <sub>1</sub> 2 <sub>1</sub> | <i>P</i> 2 <sub>1</sub> 2 <sub>1</sub> 2 <sub>1</sub> |
| cell parameters                                    |                                                       |                                                       |                                                       |
| <i>a</i> , <i>b</i> , <i>c</i> (Å)                 | 57.777, 156.233, 167.051                              | 56.978, 155.757, 165.044                              | 57.355, 156.500, 165.269                              |
| <i>a</i> , <i>b</i> , <i>g</i> (deg)               | 90.0, 90.0, 90.0                                      | 90.0, 90.0, 90.0                                      | 90.0, 90.0, 90.0                                      |
| resolution <sup>a</sup> (Å)                        | 16.27-2.65 (2.75-2.65)                                | 24.31-2.30 (2.40-2.30)                                | 16.76-2.30 (2.40-2.30)                                |
| completeness (%)                                   | 93.15 (96.52)                                         | 99.1 (97.7)                                           | 98.9 (98.1)                                           |
| redundancy                                         | 2.82 (2.40)                                           | 3.52 (2.76)                                           | 2.64 (2.04)                                           |
| $\langle I/\sigma(I) \rangle$                      | 8.38 (2.05)                                           | 10.06 (2.70)                                          | 9.49 (2.26)                                           |
| Wilson B-factor                                    | 34.14                                                 | 24.95                                                 | 27.48                                                 |
| $R_{\text{merge}}^b$                               | 0.1140 (0.3949)                                       | 0.0862 (0.2639)                                       | 0.0980 (0.3406)                                       |
| <i>Refinement</i>                                  |                                                       |                                                       |                                                       |
| $R_{\text{work}}^c$                                | 0.2118 (0.2614)                                       | 0.1876 (0.2330)                                       | 0.2024 (0.2526)                                       |
| $R_{\text{free}}^c$                                | 0.2805 (0.3449)                                       | 0.2378 (0.2917)                                       | 0.2560 (0.3243)                                       |
| Average B-factors (Å <sup>2</sup> ) (No. of Atoms) |                                                       |                                                       |                                                       |
| Chains A/B                                         |                                                       |                                                       |                                                       |
| Protein                                            | 37.0(8691)/41.9(8599)                                 | 31.8(8650)/42.3(8678)                                 | 34.5(8615)/42.4(8647)                                 |
| Inhibitor                                          | 33.3/62.8 (45)                                        | 40.6/65.7 (45)                                        | 23.7/49.3 (45)                                        |
| NDP                                                | 52.3/81.6 (71)                                        | 35.2/92.4 (71)                                        | 35.9/73.2 (71)                                        |
| UMP                                                | 59.5/59.7 (30)                                        | 33.3/36.3 (30)                                        | 37.4/45.7 (30)                                        |
| GOL                                                | -                                                     | 23.2/30.0 (12)                                        | 28.1/30.1 (12)                                        |
| Water                                              | 30.52 (285)                                           | 31.53 (642)                                           | 33.76 (620)                                           |
| RMSD                                               |                                                       |                                                       |                                                       |
| Bond lengths (Å)                                   | 0.008                                                 | 0.008                                                 | 0.008                                                 |
| Bond angles (°)                                    | 0.983                                                 | 0.927                                                 | 0.920                                                 |
| Ramachadran Plot                                   |                                                       |                                                       |                                                       |
| favored (%)                                        | 94.39                                                 | 96.63                                                 | 96.62                                                 |
| allowed (%)                                        | 5.61                                                  | 3.37                                                  | 3.29                                                  |
| outlier (%)                                        | 0                                                     | 0                                                     | 0.10                                                  |

<sup>a</sup>Values in parentheses are for the highest-resolution shell.

<sup>b</sup> $R_{\text{merge}} = \sum_{hkl} \sum_i |I_i(hkl) - \langle I(hkl) \rangle| / \sum_{hkl} \sum_i I_i(hkl)$ , where  $I_i(hkl)$  is the intensity of an individual reflection and  $\langle I(hkl) \rangle$  is the mean intensity of symmetry-equivalent reflections.

<sup>c</sup> $R_{\text{work}} = \sum_{hkl} ||F_{\text{obs}}| - |F_{\text{calc}}|| / \sum_{hkl} |F_{\text{obs}}|$ , where  $F_{\text{obs}}$  and  $F_{\text{calc}}$  are the observed and calculated structure-factor amplitudes, respectively.  $R_{\text{free}}$  was calculated in the same manner as  $R_{\text{work}}$  but using only a 5% unrefined subset of the reflection data.

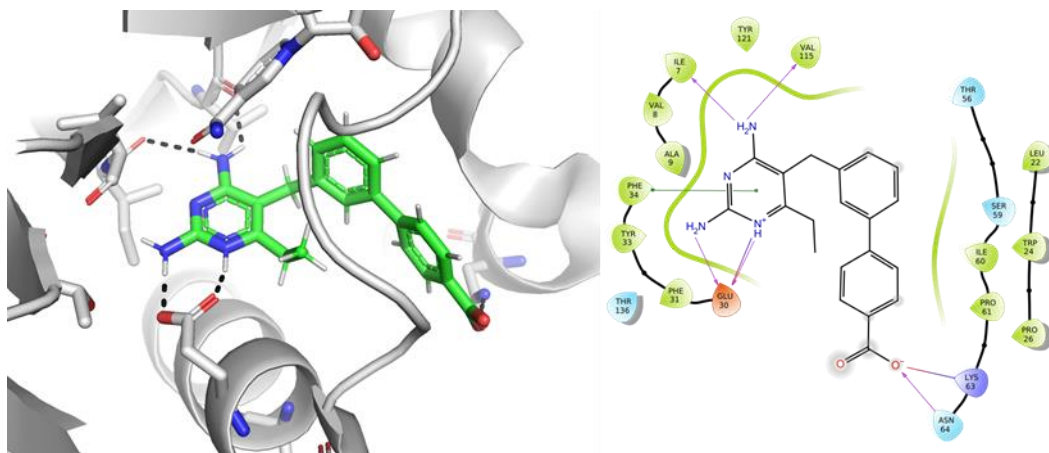

**Figure S3.** Molecular docking results and binding mode schematic representation for **6** in the active site of *HsDHFR* (PDB 4DDR). Hydrogen bonds appear in pink, charge pairing interactions appear in purple, and  $\pi$ - $\pi$  appear in green.

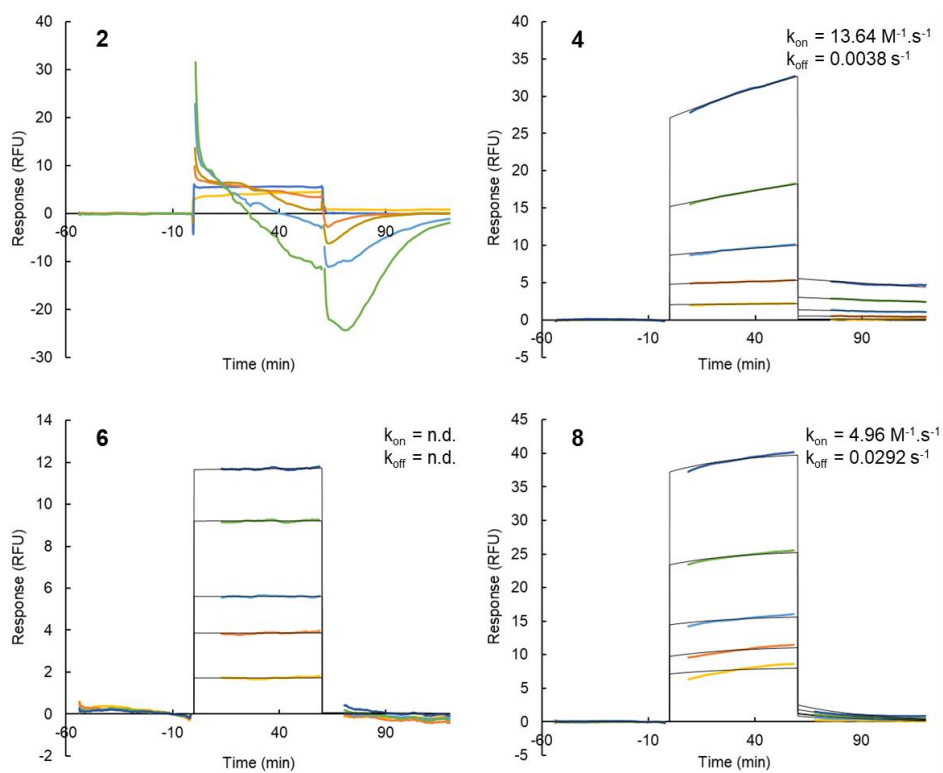

**Figure S4.** SPR profiles for **2**, **4**, **6** and **8** binding to QM *PjDHFR*. Raw data appears as colour lines, curve fitting appears as thin black lines. n.d.: not determined.

<sup>1</sup>H NMR in DMSO-d<sub>6</sub>

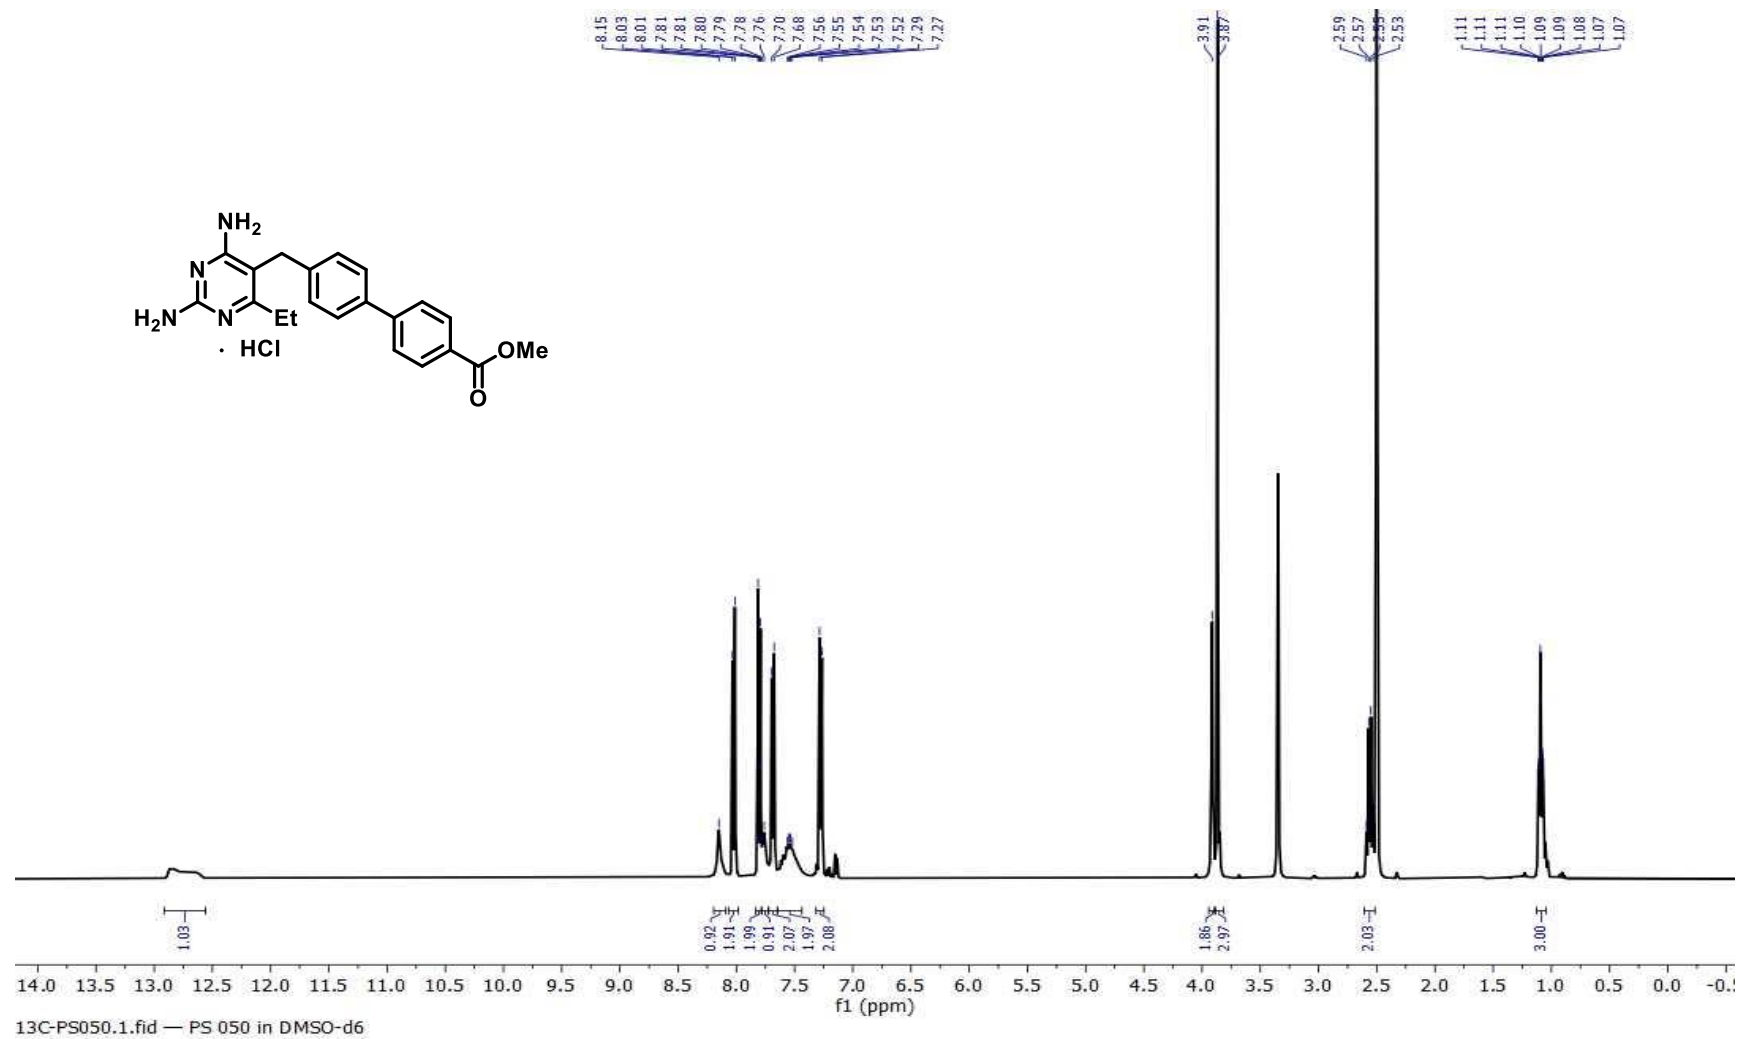

Figure S5. <sup>1</sup>H NMR spectra of compound 1-HCl.

<sup>13</sup>C NMR in DMSO-*d*<sub>6</sub>

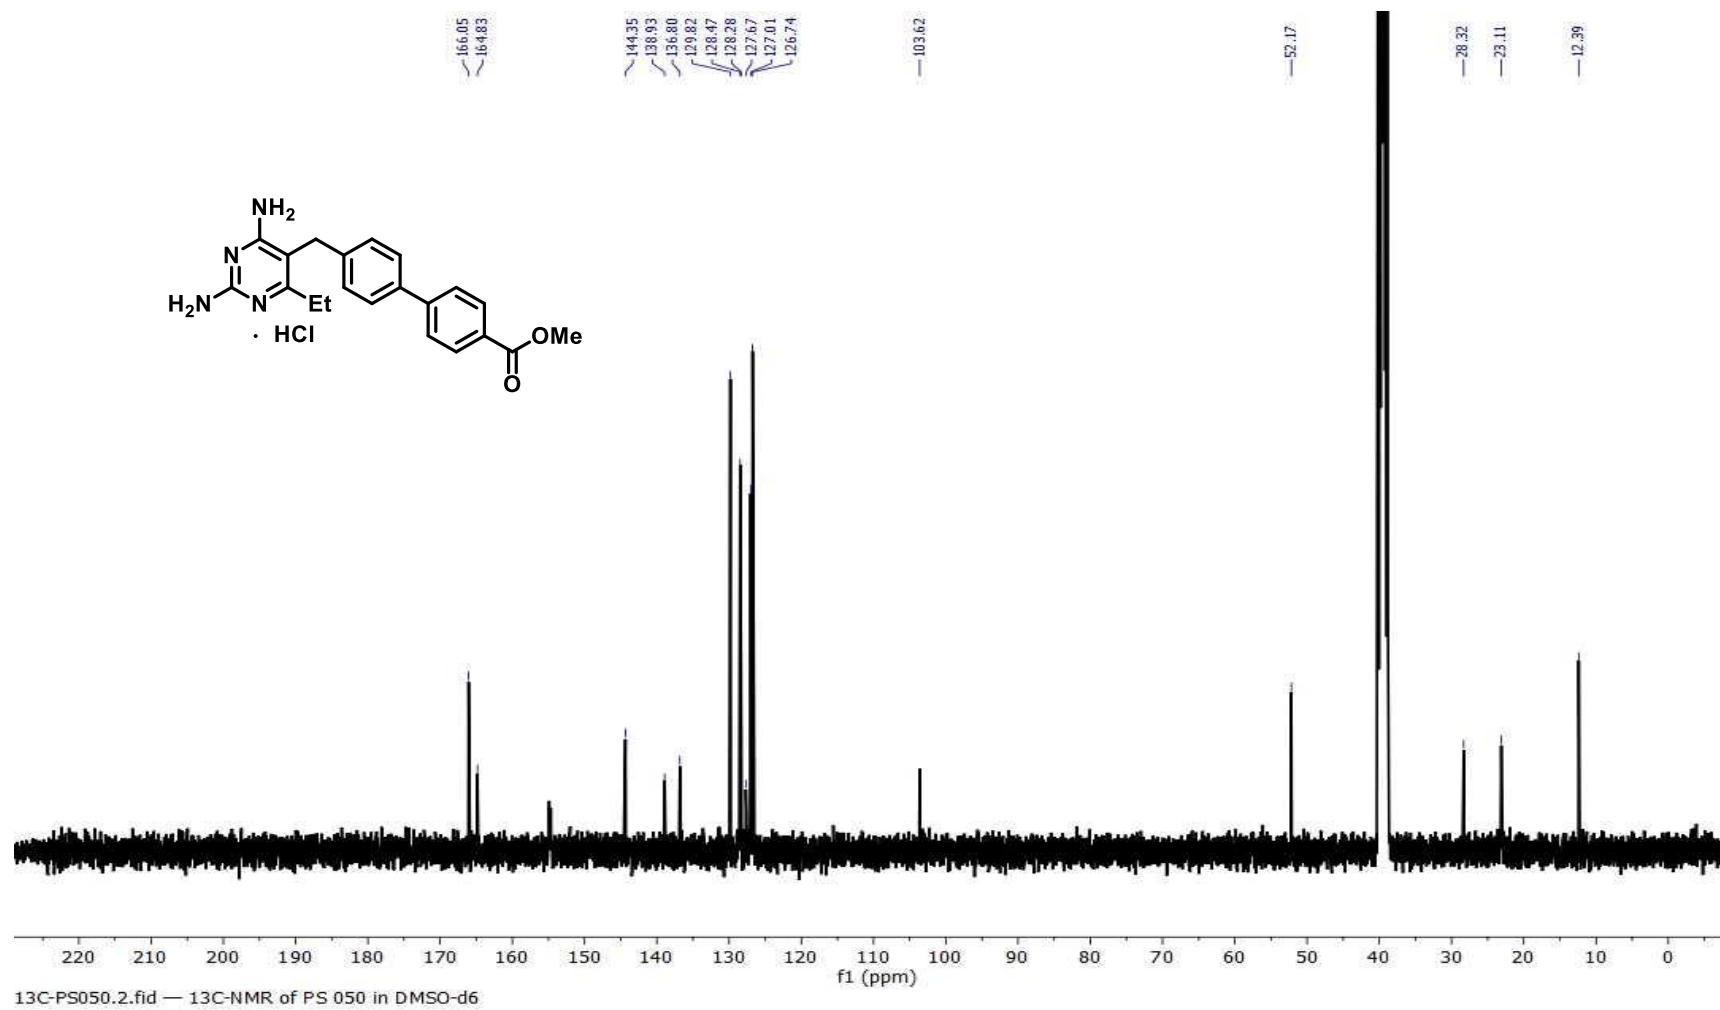

Figure S6. <sup>13</sup>C NMR spectra of compound 1-HCl.

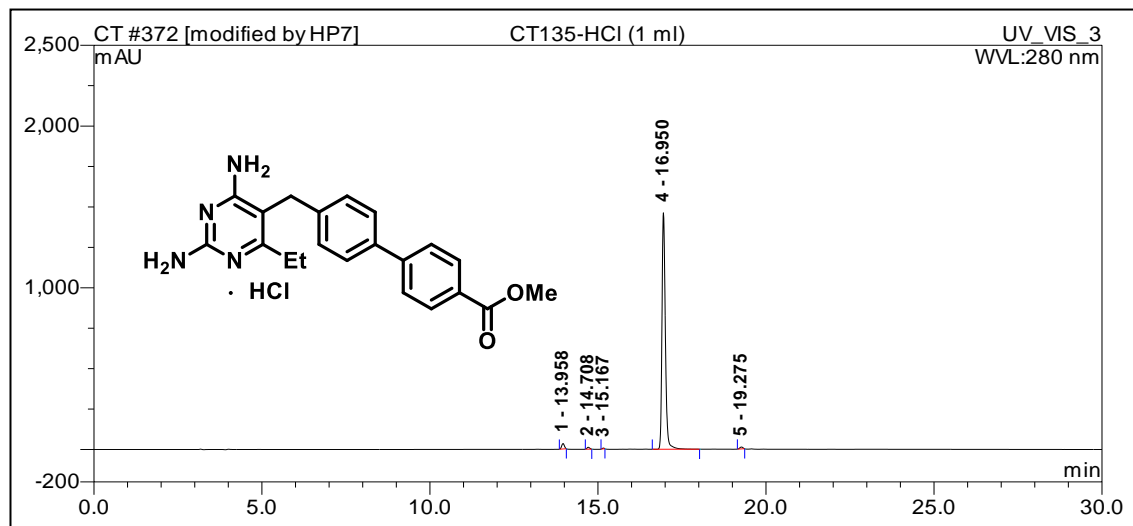

### 372 CT135-HCl (1 ml)

|                  |                                            |                   |          |
|------------------|--------------------------------------------|-------------------|----------|
| Sample Name:     | CT135-HCl (1 ml)                           | Injection Volume: | 2.0      |
| Vial Number:     | RD3                                        | Channel:          | UV_VIS_3 |
| Sample Type:     | unknown                                    | Wavelength:       | 280.0    |
| Control Program: | 15-60_30min_AB_flow 0-6_column B (1-2_6-1) | Bandwidth:        | 1        |
| Quantif. Method: | Standard CALIBRATION                       | Dilution Factor:  | 1.0000   |
| Recording Time:  | 12/8/2021 18:16                            | Sample Weight:    | 1.0000   |
| Run Time (min):  | 30.00                                      | Sample Amount:    | 1.0000   |

| No.           | Ret.Time min | Peak Name | Height mAU | Area mAU*min | Rel.Area % | Amount ng | Type |
|---------------|--------------|-----------|------------|--------------|------------|-----------|------|
| 1             | 13.96        | na        | 33.427     | 3.130        | 1.77       | n.a.      | BMB* |
| 2             | 14.71        | na        | 11.534     | 1.058        | 0.60       | n.a.      | BMB* |
| 3             | 15.17        | na        | 4.409      | 0.304        | 0.17       | n.a.      | BMB* |
| 4             | 16.95        | na        | 1461.851   | 170.811      | 96.75      | n.a.      | BMB  |
| 5             | 19.28        | na        | 11.540     | 1.250        | 0.71       | n.a.      | BMB* |
| <b>Total:</b> |              |           | 1522.761   | 176.553      | 100.00     | 0.000     |      |

Figure S7. HPLC profile of compound 1-HCl.



<sup>1</sup>H NMR in DMSO-d<sub>6</sub>

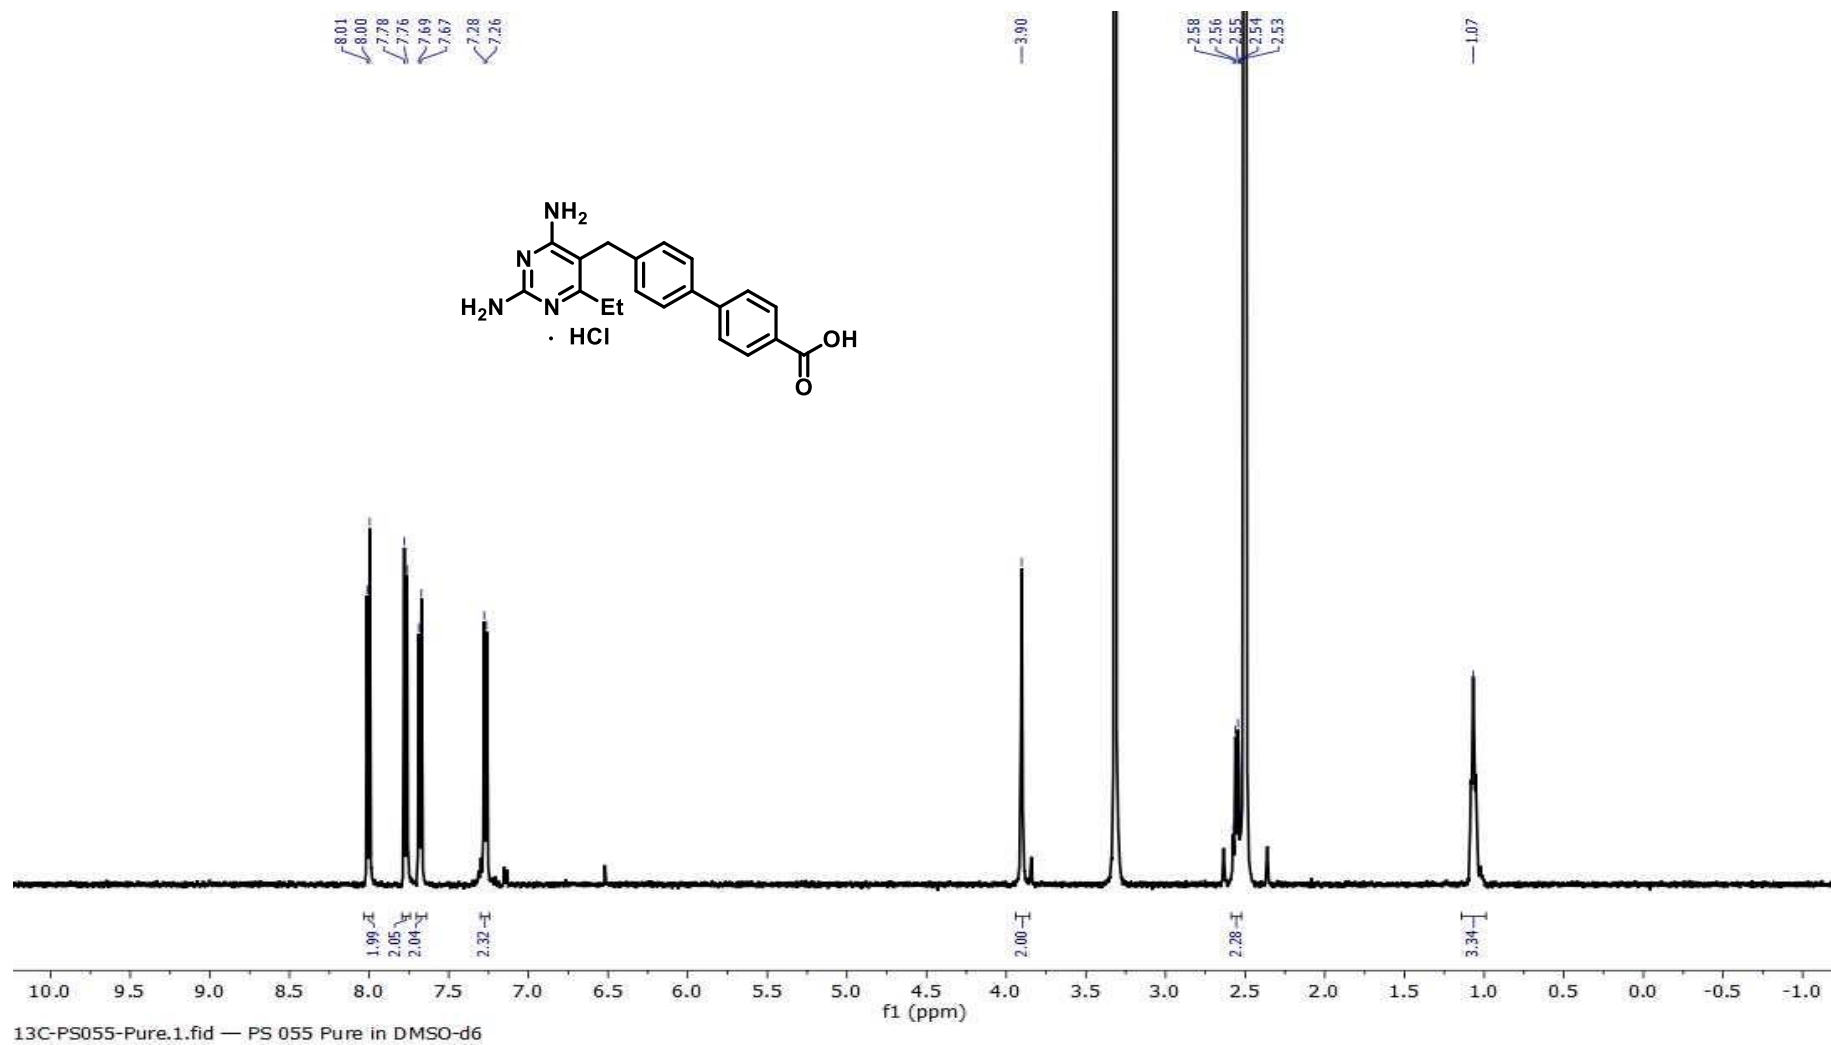

Figure S8. <sup>1</sup>H NMR spectra of compound 2-HCl.

<sup>13</sup>C NMR in DMSO-*d*<sub>6</sub>

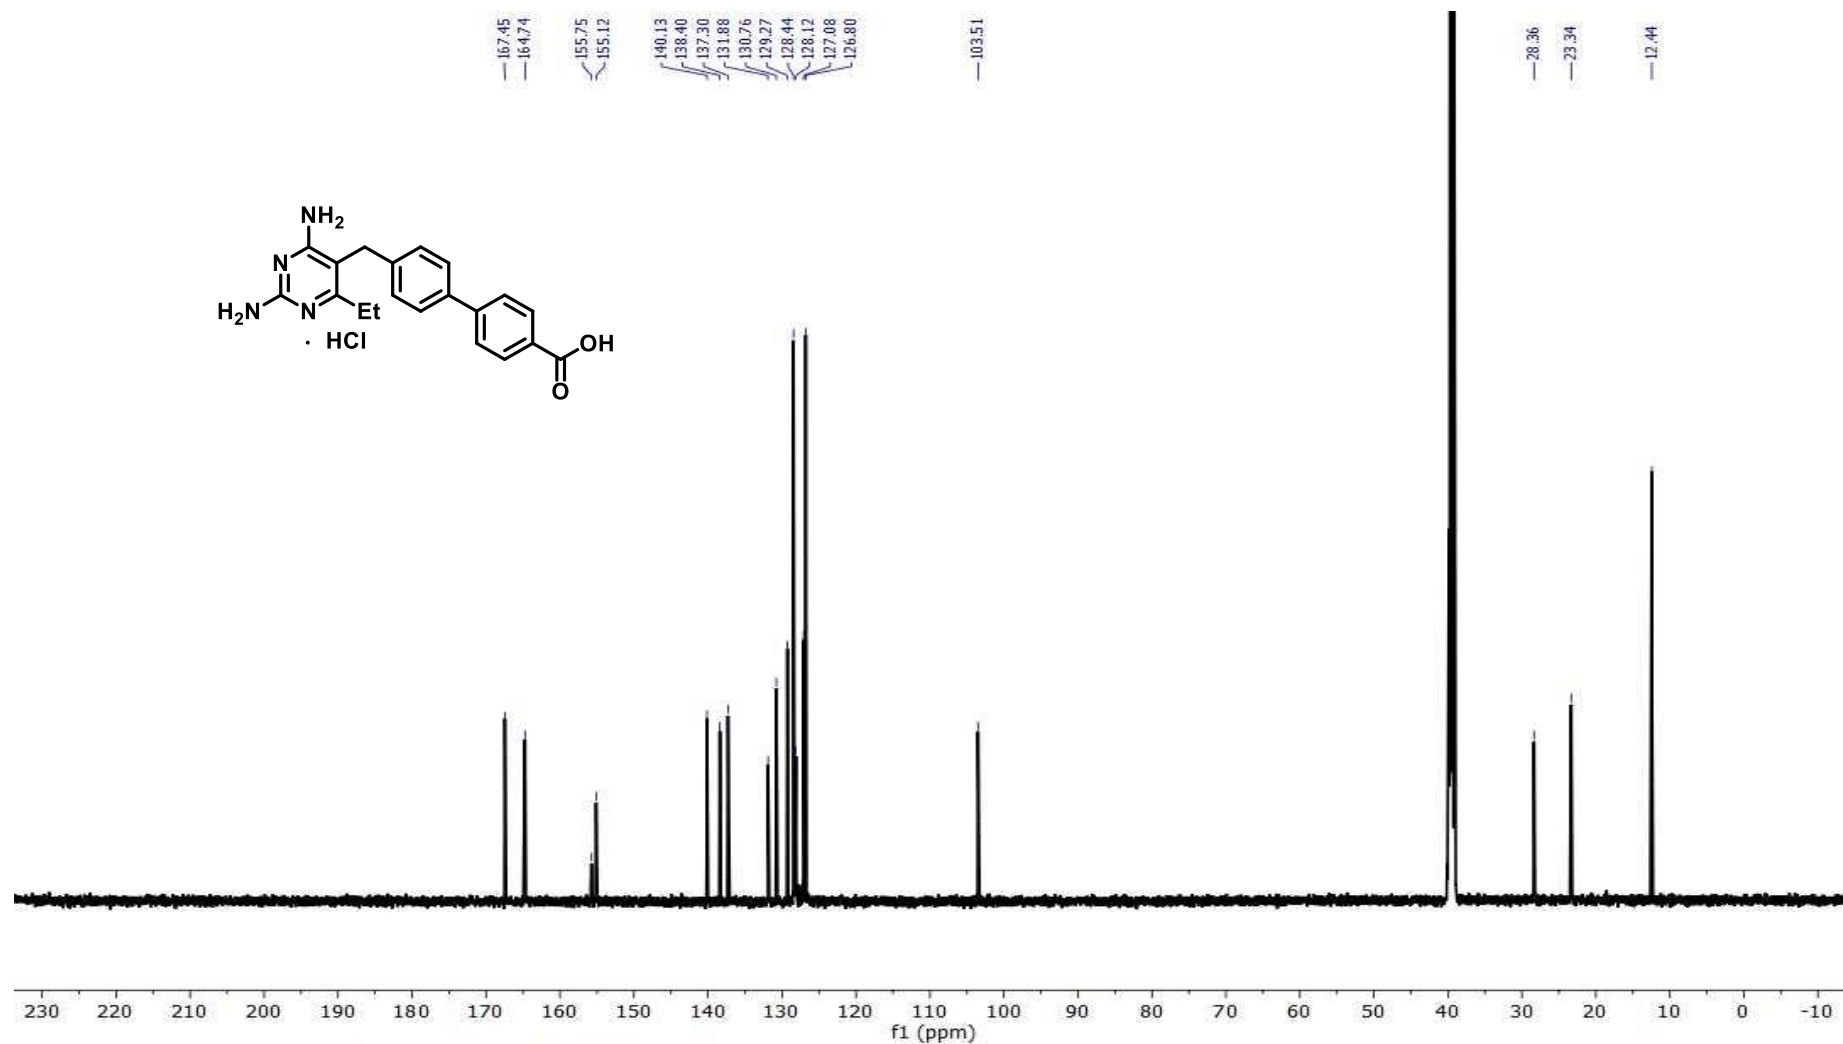

Figure S9. <sup>13</sup>C NMR spectra of compound 2-HCl.

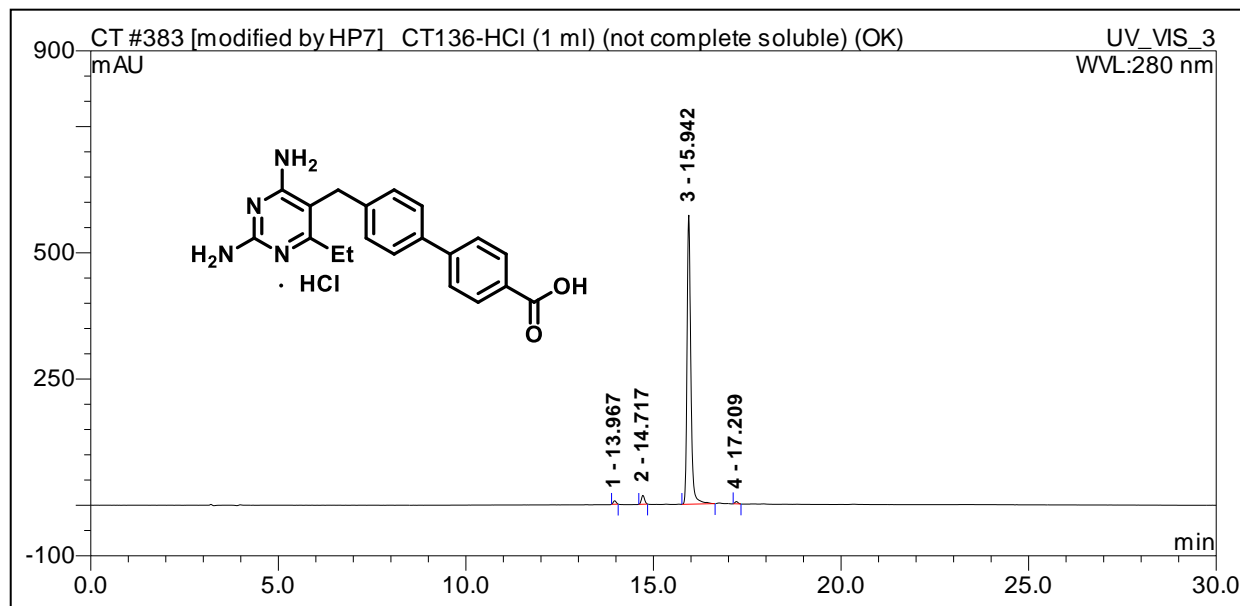

### 383 CT136-HCl (1 ml) (not complete soluble) (OK)

|                  |                                              |                   |          |
|------------------|----------------------------------------------|-------------------|----------|
| Sample Name:     | CT136-HCl (1 ml) (not complete soluble) (OK) | Injection Volume: | 1.0      |
| Vial Number:     | GA8                                          | Channel:          | UV_VIS_3 |
| Sample Type:     | unknown                                      | Wavelength:       | 280.0    |
| Control Program: | 15-60_30min_AB_flow 0-6_column B (1-2_6-1)   | Bandwidth:        | 1        |
| Quantif. Method: | Standard CALIBRATION                         | Dilution Factor:  | 1.0000   |
| Recording Time:  | 12/9/2021 17:47                              | Sample Weight:    | 1.0000   |
| Run Time (min):  | 30.00                                        | Sample Amount:    | 1.0000   |

| No.           | Ret.Time<br>min | Peak Name | Height<br>mAU | Area<br>mAU*min | Rel.Area<br>% | Amount<br>ng | Type |
|---------------|-----------------|-----------|---------------|-----------------|---------------|--------------|------|
| 1             | 13.97           | na        | 6.753         | 0.602           | 0.87          | n.a.         | BMB* |
| 2             | 14.72           | na        | 17.547        | 1.718           | 2.47          | n.a.         | BMB* |
| 3             | 15.94           | na        | 572.206       | 66.668          | 96.04         | n.a.         | BMB  |
| 4             | 17.21           | na        | 4.520         | 0.431           | 0.62          | n.a.         | BMB* |
| <b>Total:</b> |                 |           | 601.027       | 69.419          | 100.00        | 0.000        |      |

Figure S10. HPLC profile of compound 2-HCl.

<sup>1</sup>H NMR in DMSO-d<sub>6</sub>

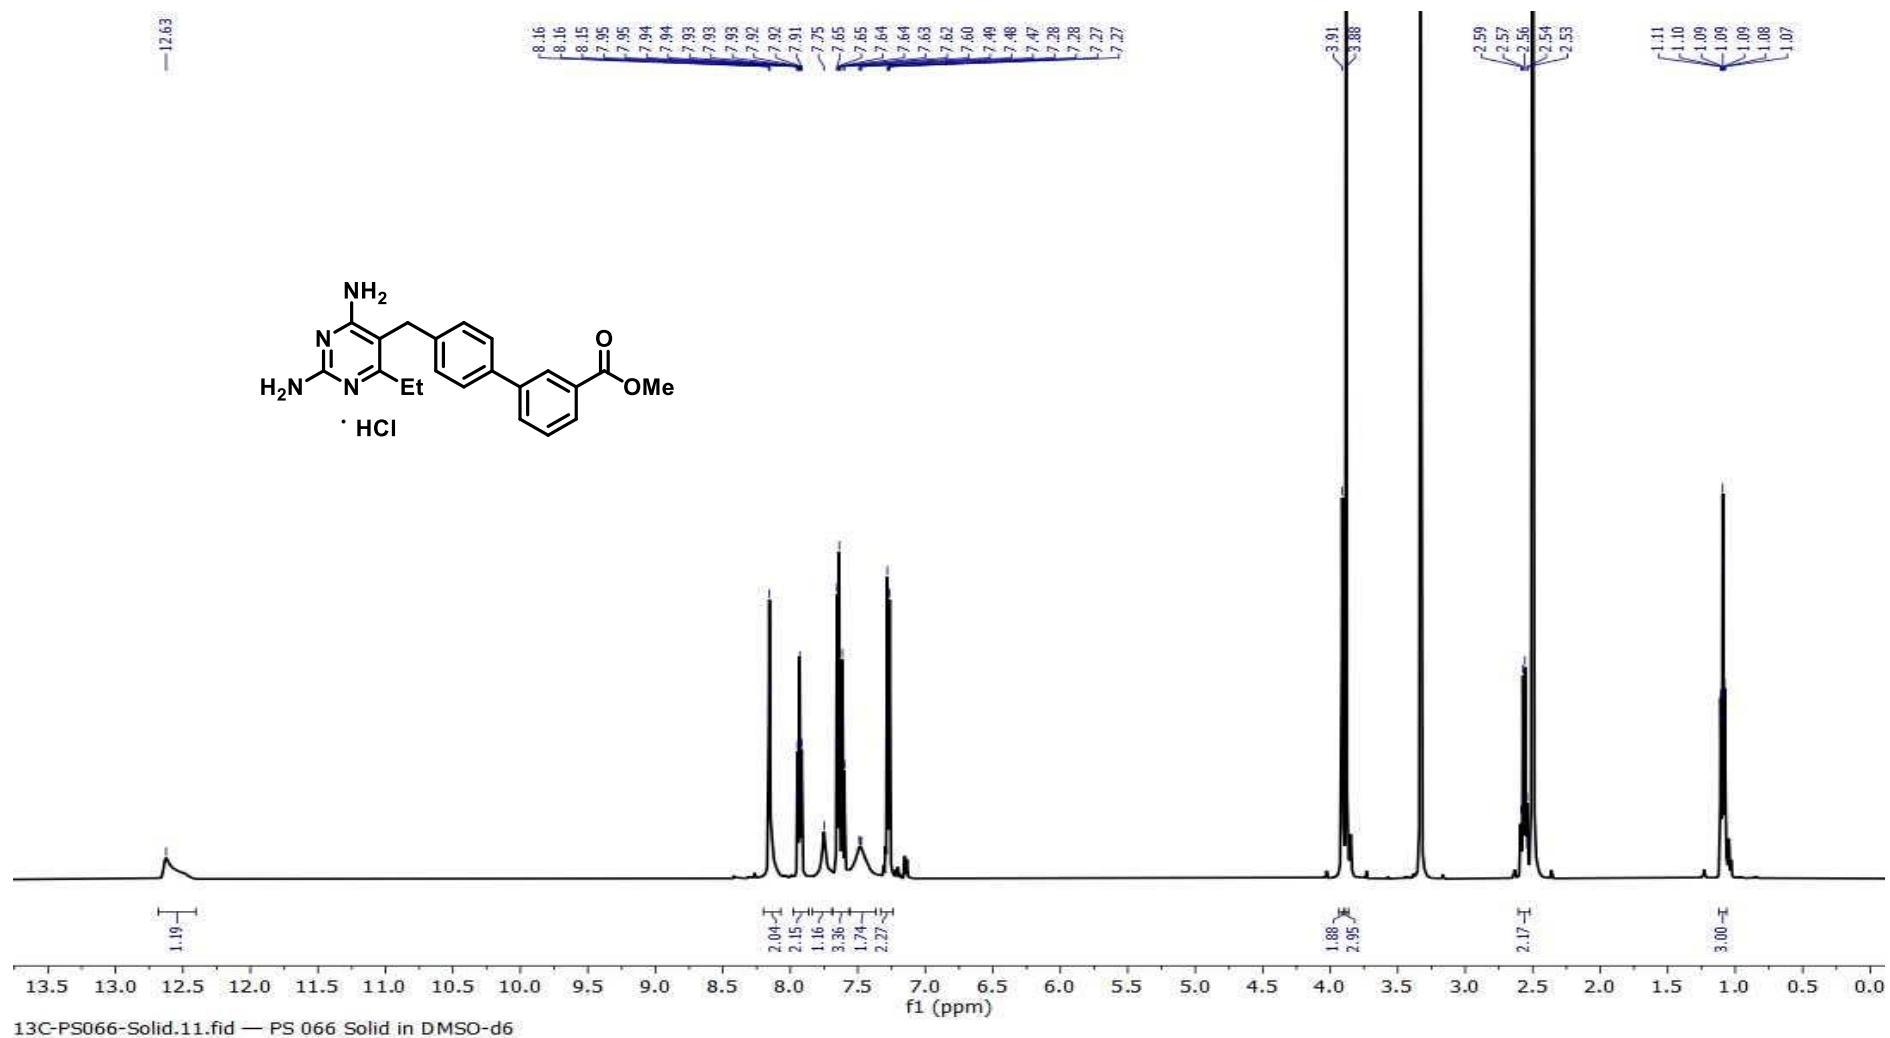

**Figure S11.** <sup>1</sup>H NMR spectra of compound 3-HCl.

<sup>13</sup>C NMR in DMSO-*d*<sub>6</sub>

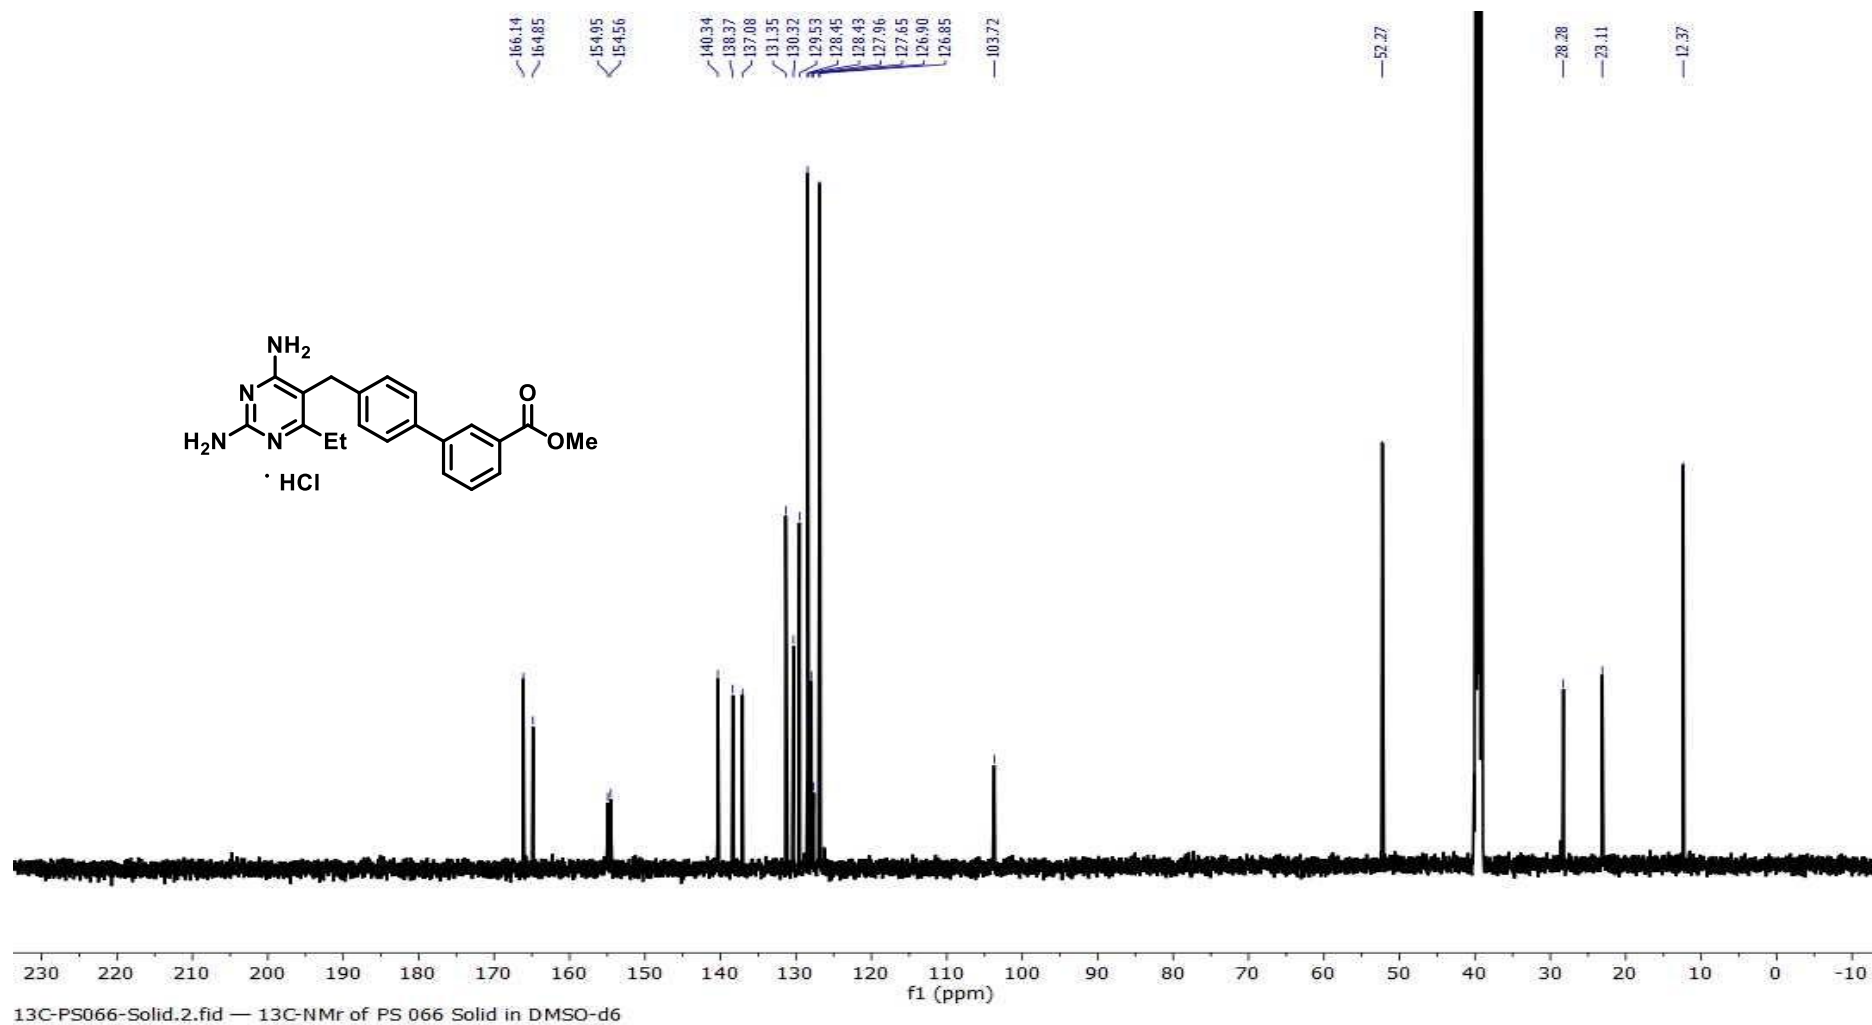

Figure S12. <sup>13</sup>C NMR spectra of compound 3-HCl.

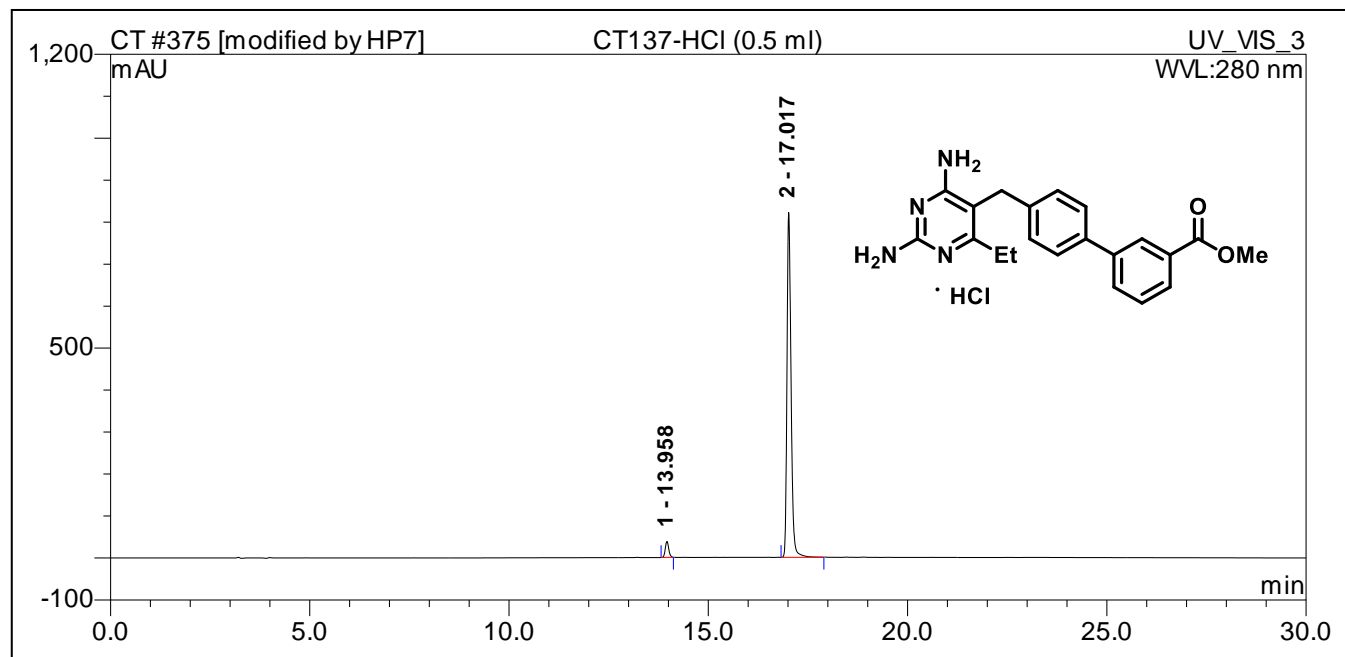

### 375 CT137-HCl (0.5 ml)

|                  |                                            |                   |          |
|------------------|--------------------------------------------|-------------------|----------|
| Sample Name:     | CT137-HCl (0.5 ml)                         | Injection Volume: | 1.0      |
| Vial Number:     | RD4                                        | Channel:          | UV_VIS_3 |
| Sample Type:     | unknown                                    | Wavelength:       | 280.0    |
| Control Program: | 15-60_30min_AB_flow 0-6_column B (1-2_6-1) | Bandwidth:        | 1        |
| Quantif. Method: | Standard CALIBRATION                       | Dilution Factor:  | 1.0000   |
| Recording Time:  | 12/8/2021 18:52                            | Sample Weight:    | 1.0000   |
| Run Time (min):  | 30.00                                      | Sample Amount:    | 1.0000   |

| No.           | Ret.Time<br>min | Peak Name | Height<br>mAU | Area<br>mAU*min | Rel.Area<br>% | Amount<br>ng | Type |
|---------------|-----------------|-----------|---------------|-----------------|---------------|--------------|------|
| 1             | 13.96           | na        | 37.904        | 3.823           | 3.78          | n.a.         | BMB* |
| 2             | 17.02           | na        | 821.642       | 97.314          | 96.22         | n.a.         | BMB  |
| <b>Total:</b> |                 |           | 859.546       | 101.137         | 100.00        | 0.000        |      |

Figure S13. HPLC profile of compound 3-HCl.

<sup>1</sup>H NMR in DMSO-d<sub>6</sub>

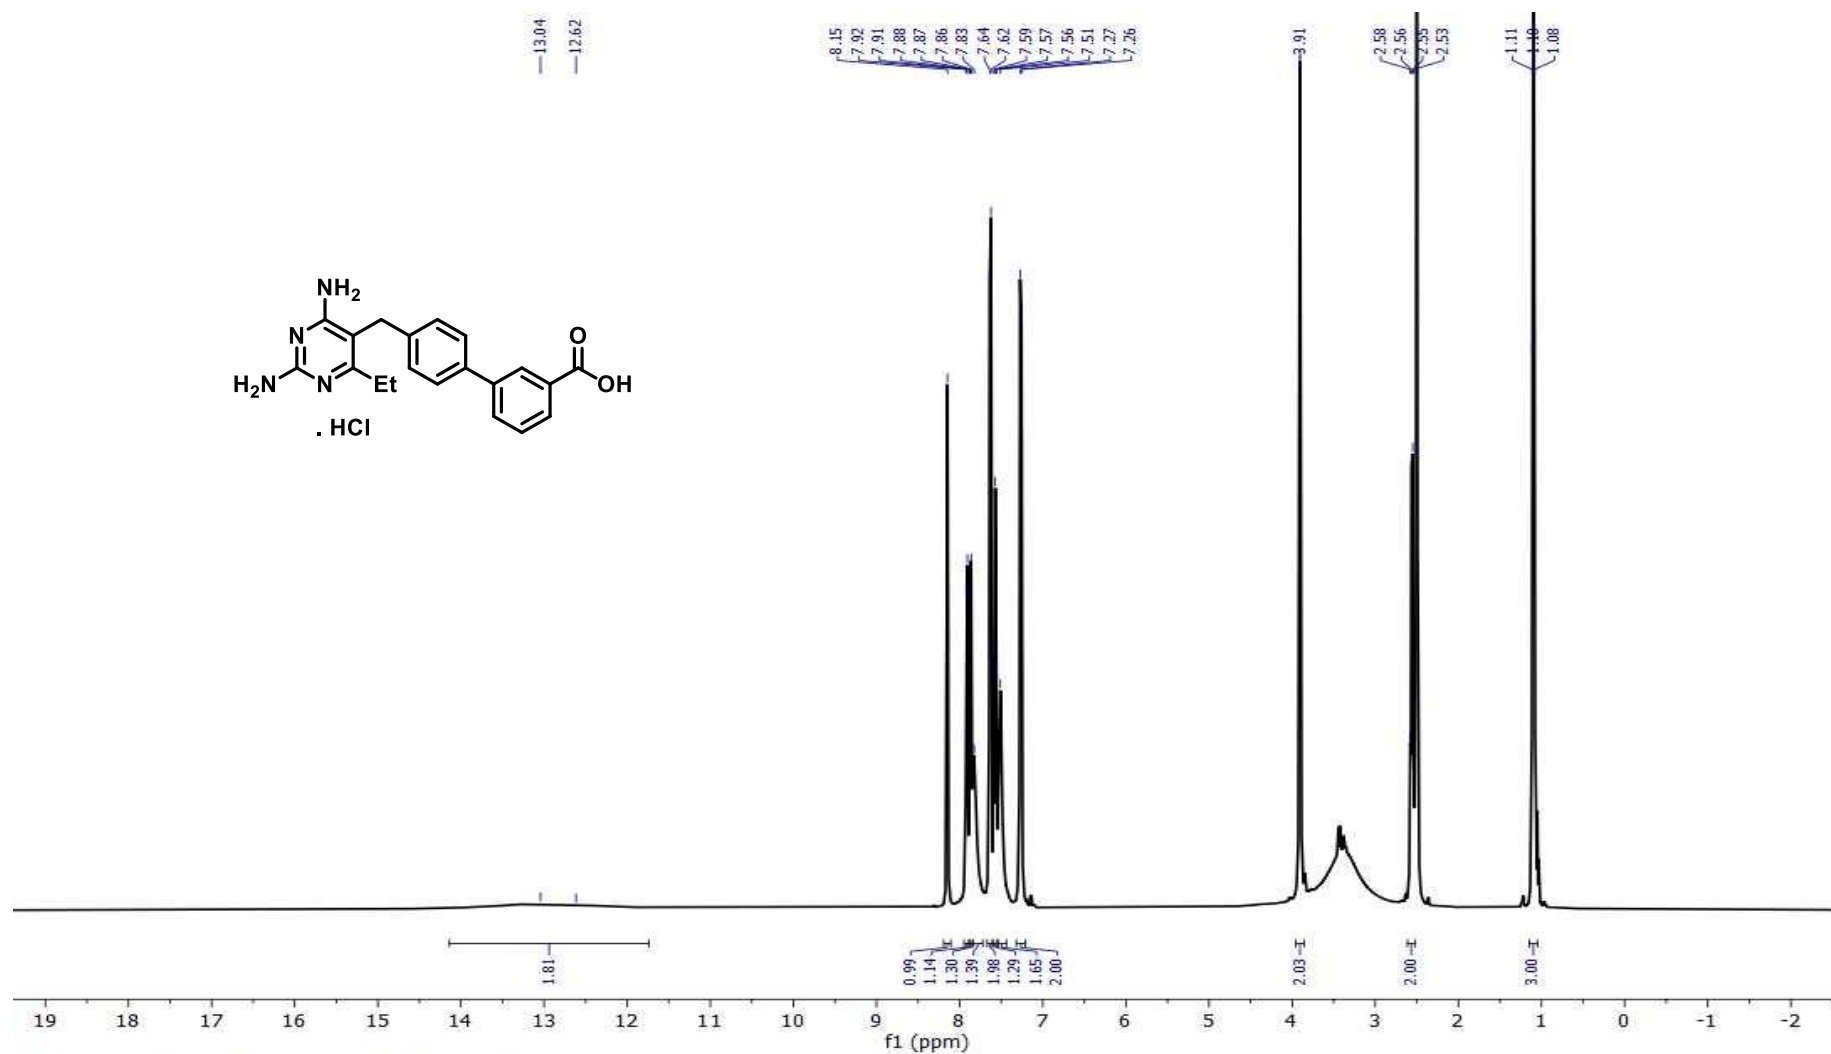

13C-PS069-Solid-data.1.fid — PS 069 Solid data in DMSO-d<sub>6</sub>

**Figure S14.** <sup>1</sup>H NMR spectra of compound 4-HCl.

<sup>13</sup>C NMR in DMSO-*d*<sub>6</sub>

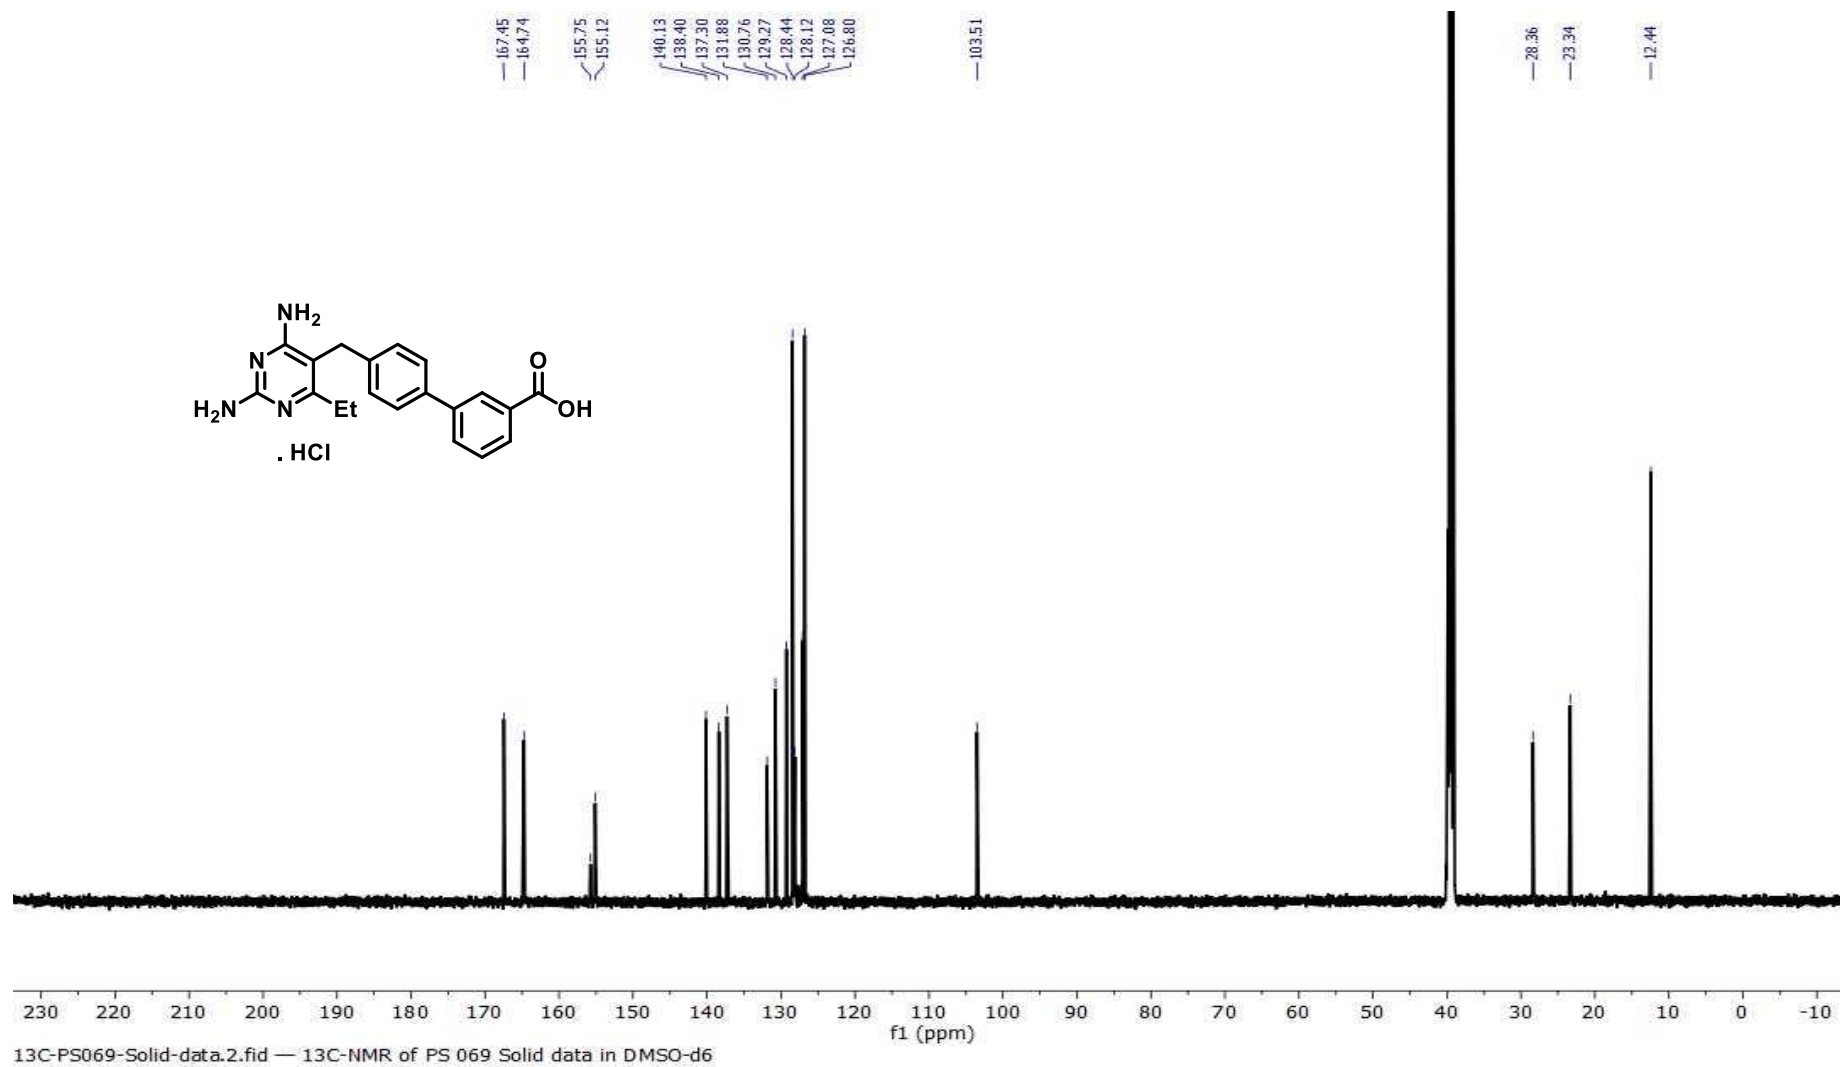

Figure S15. <sup>13</sup>C NMR spectra of compound 4-HCl.



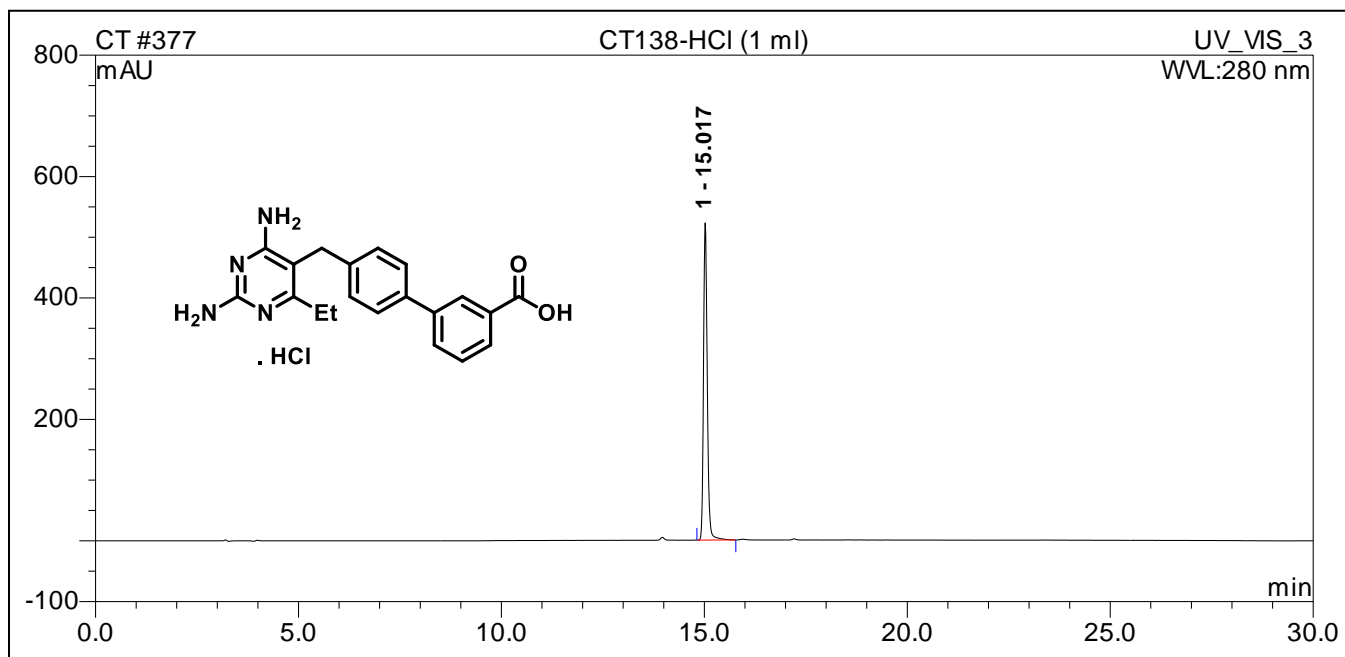

| <b>377 CT138-HCl (1 ml)</b> |                                            |                   |          |
|-----------------------------|--------------------------------------------|-------------------|----------|
| Sample Name:                | CT138-HCl (1 ml)                           | Injection Volume: | 1.0      |
| Vial Number:                | RD5                                        | Channel:          | UV_VIS_3 |
| Sample Type:                | unknown                                    | Wavelength:       | 280.0    |
| Control Program:            | 15-60_30min_AB_flow 0-6_column B (1-2_6-1) | Bandwidth:        | 1        |
| Quantif. Method:            | Standard CALIBRATION                       | Dilution Factor:  | 1.0000   |
| Recording Time:             | 12/9/2021 15:59                            | Sample Weight:    | 1.0000   |
| Run Time (min):             | 30.00                                      | Sample Amount:    | 1.0000   |

| No.           | Ret.Time<br>min | Peak Name | Height<br>mAU | Area<br>mAU*min | Rel.Area<br>% | Amount<br>ng | Type |
|---------------|-----------------|-----------|---------------|-----------------|---------------|--------------|------|
| 1             | 15.02           | na        | 522.387       | 56.121          | 100.00        | n.a.         | BMB  |
| <b>Total:</b> |                 |           | 522.387       | 56.121          | 100.00        | 0.000        |      |

Figure S16. HPLC profile of compound 4-HCl.

<sup>1</sup>H NMR in DMSO-d<sub>6</sub>

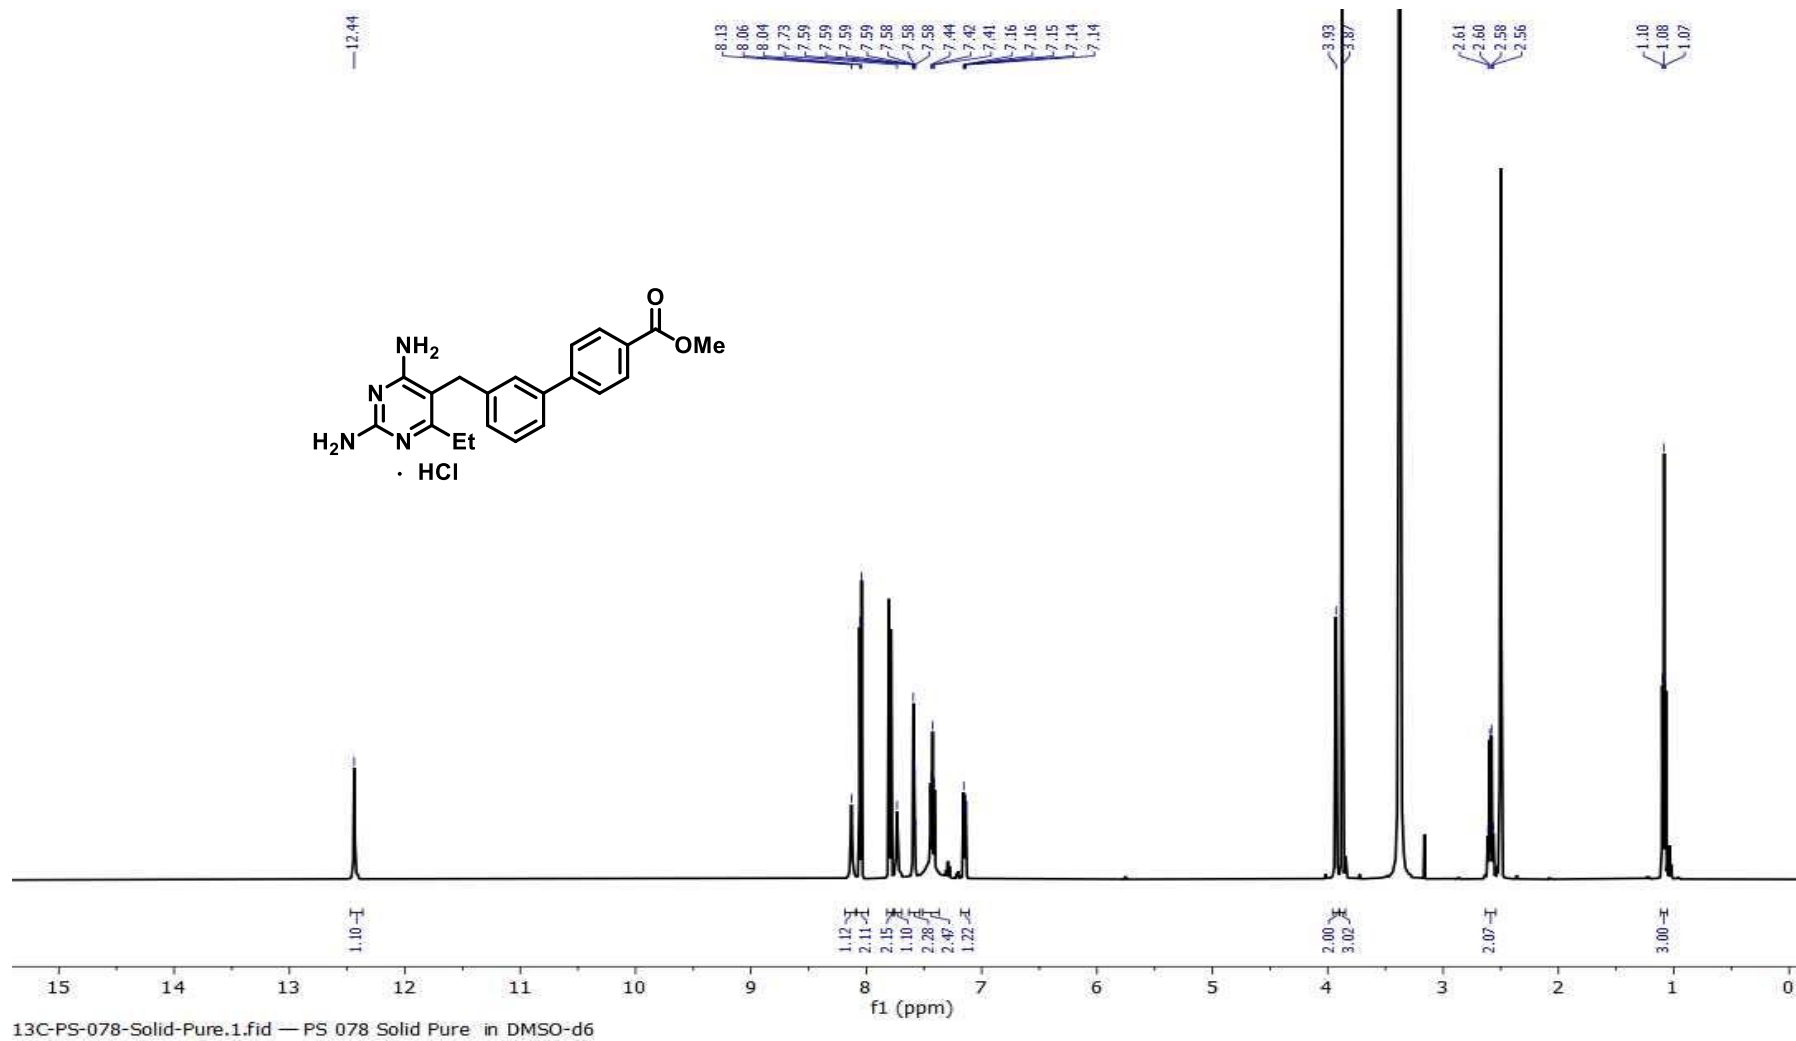

Figure S17. <sup>1</sup>H NMR spectra of compound 5-HCl.

<sup>13</sup>C NMR in DMSO-*d*<sub>6</sub>

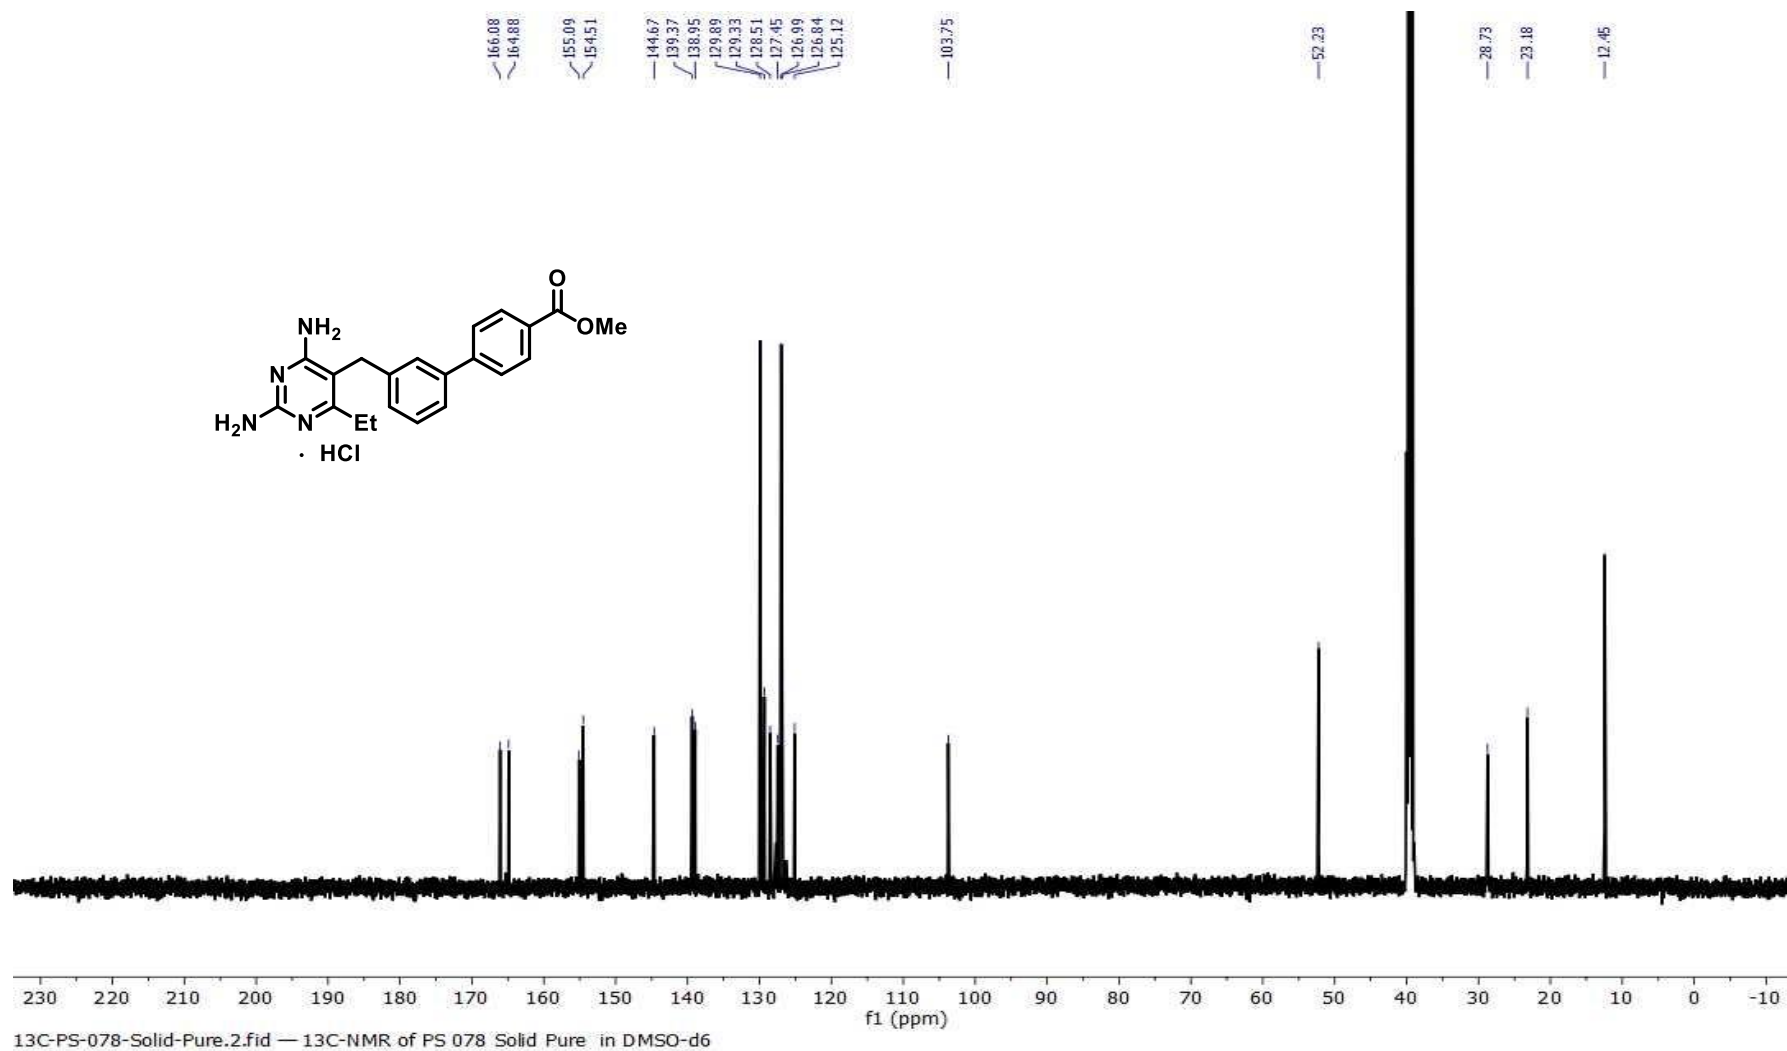

**Figure S18.** <sup>13</sup>C NMR spectra of compound 5-HCl.

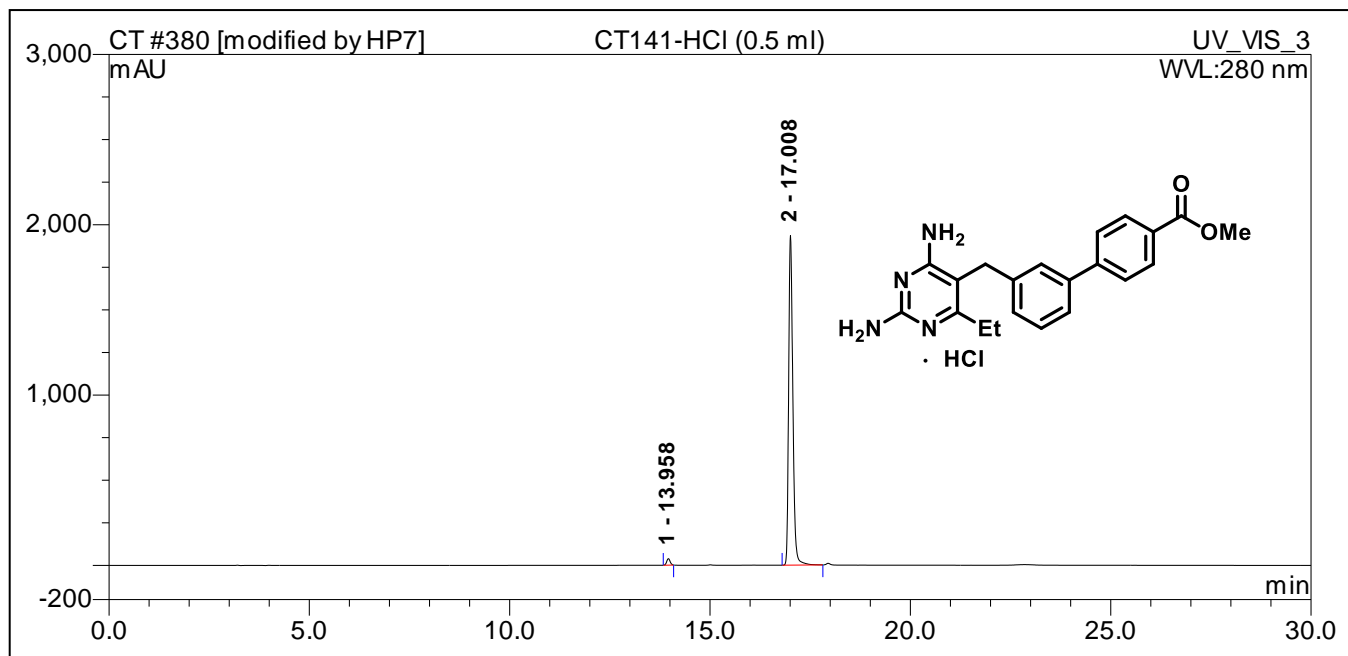

**380 CT141-HCl (0.5 ml)**

|                  |                                            |                   |          |
|------------------|--------------------------------------------|-------------------|----------|
| Sample Name:     | CT141-HCl (0.5 ml)                         | Injection Volume: | 1.0      |
| Vial Number:     | RD8                                        | Channel:          | UV_VIS_3 |
| Sample Type:     | unknown                                    | Wavelength:       | 280.0    |
| Control Program: | 15-60_30min_AB_flow 0-6_column B (1-2_6-1) | Bandwidth:        | 1        |
| Quantif. Method: | Standard CALIBRATION                       | Dilution Factor:  | 1.0000   |
| Recording Time:  | 12/8/2021 21:17                            | Sample Weight:    | 1.0000   |
| Run Time (min):  | 30.00                                      | Sample Amount:    | 1.0000   |

| No.           | Ret.Time<br>min | Peak Name | Height<br>mAU | Area<br>mAU*min | Rel.Area<br>% | Amount<br>ng | Type |
|---------------|-----------------|-----------|---------------|-----------------|---------------|--------------|------|
| 1             | 13.96           | na        | 38.211        | 3.790           | 1.59          | n.a.         | BMB* |
| 2             | 17.01           | na        | 1934.245      | 234.896         | 98.41         | n.a.         | BMB  |
| <b>Total:</b> |                 |           | 1972.456      | 238.686         | 100.00        | 0.000        |      |

Figure S19. HPLC profile of compound 5-HCl.

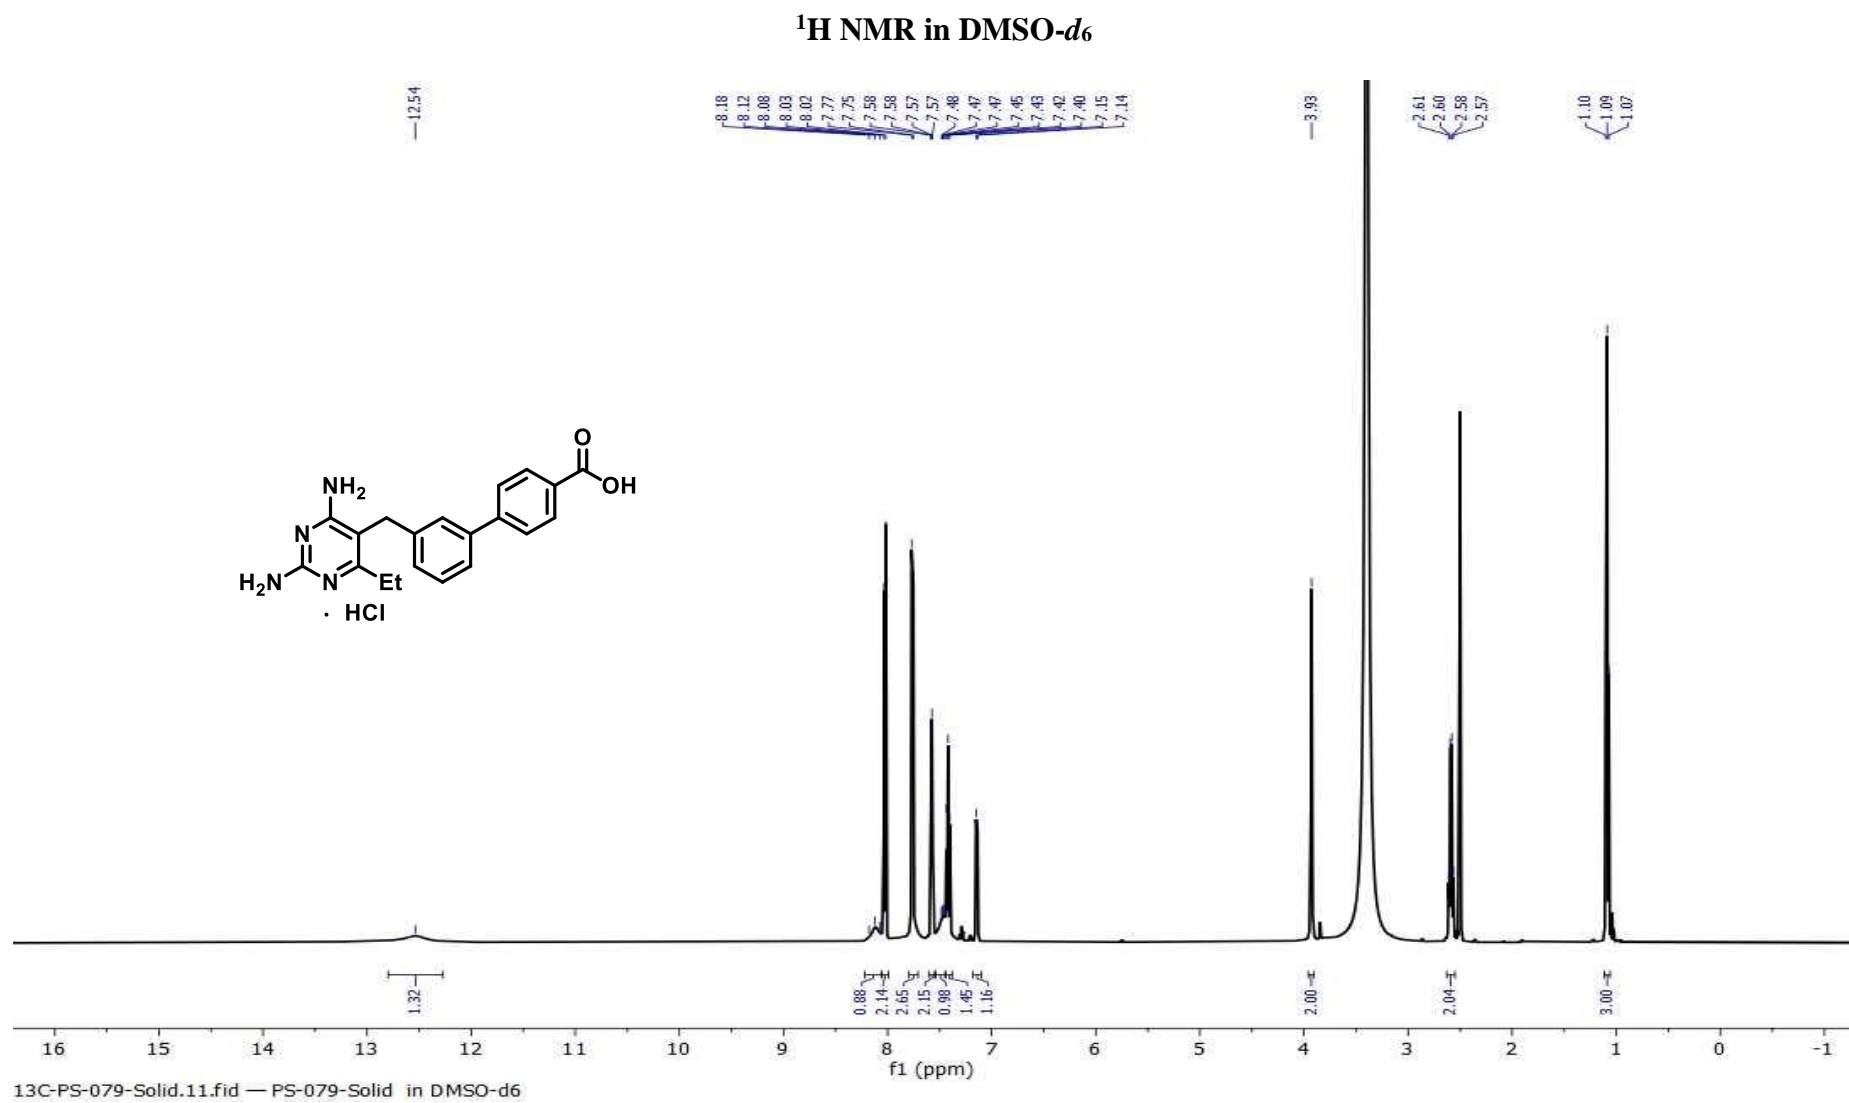

**Figure S20.**  $^1\text{H}$  NMR spectra of compound 6-HCl.

<sup>13</sup>C NMR in DMSO-d<sub>6</sub>

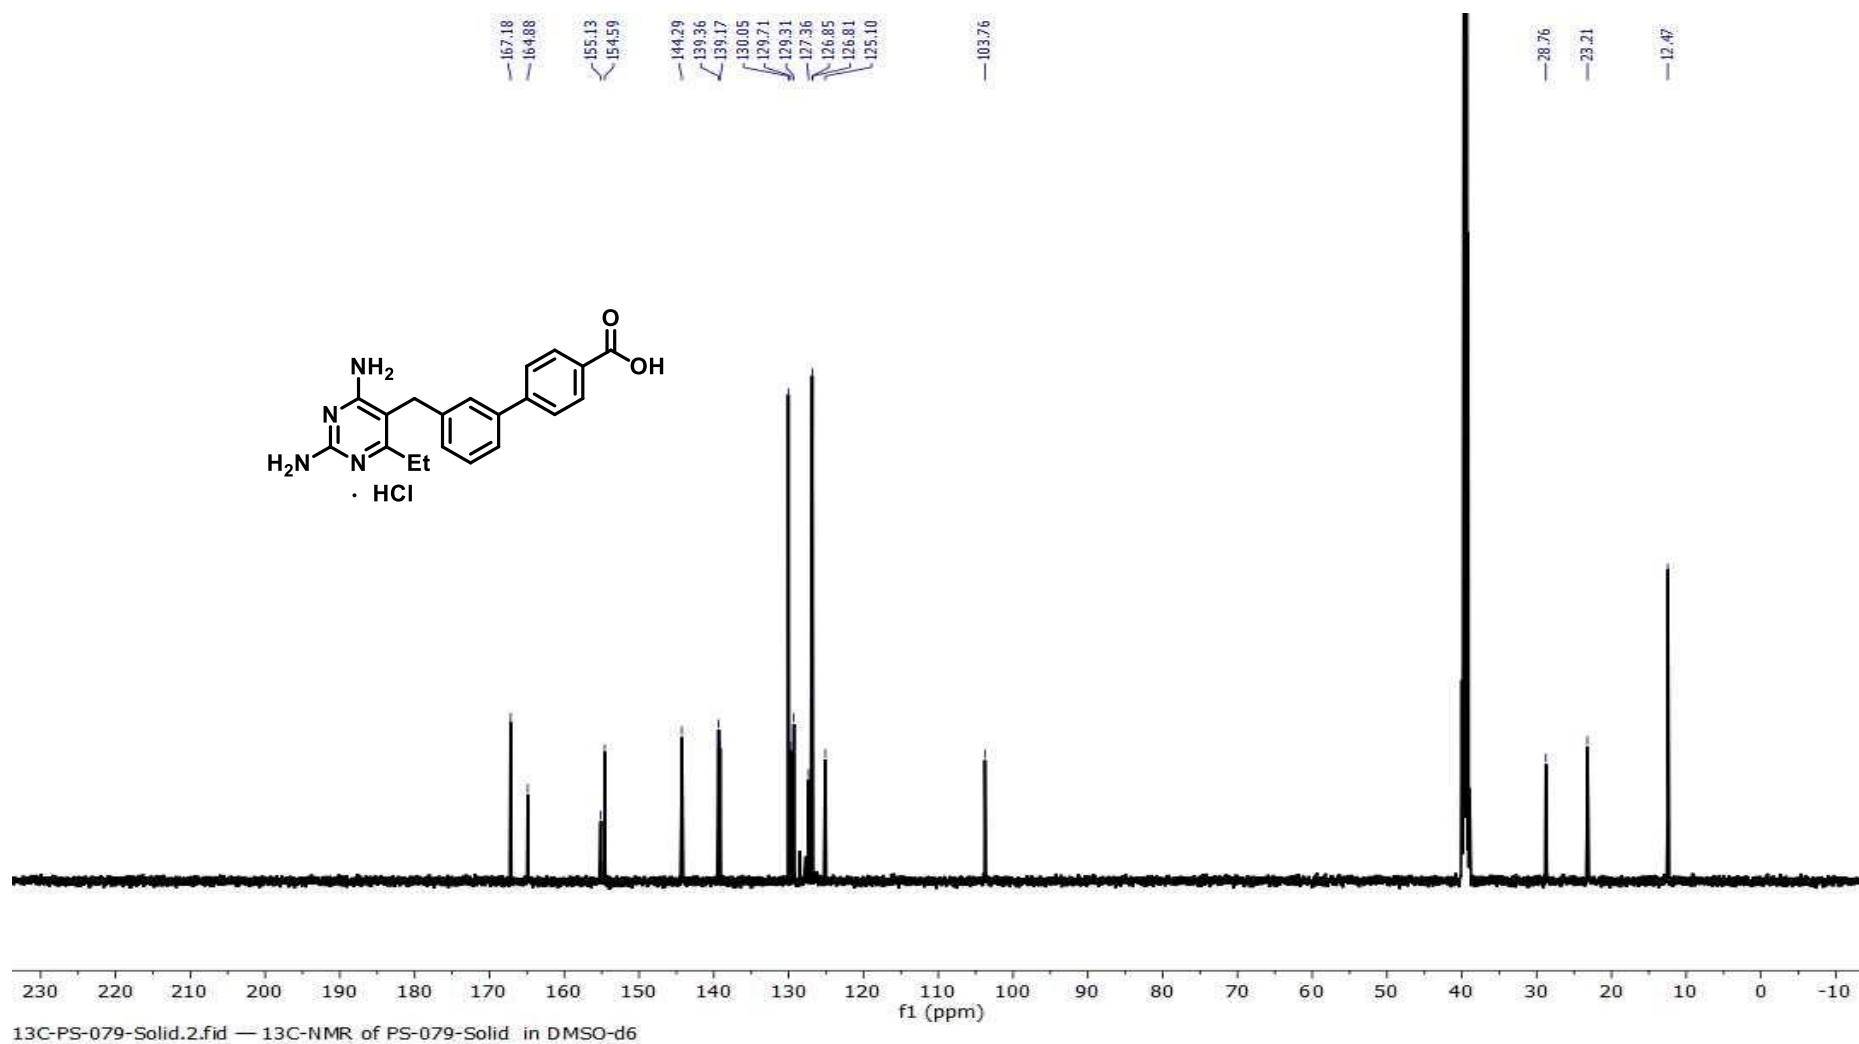

Figure S21. <sup>13</sup>C NMR spectra of compound 6-HCl.

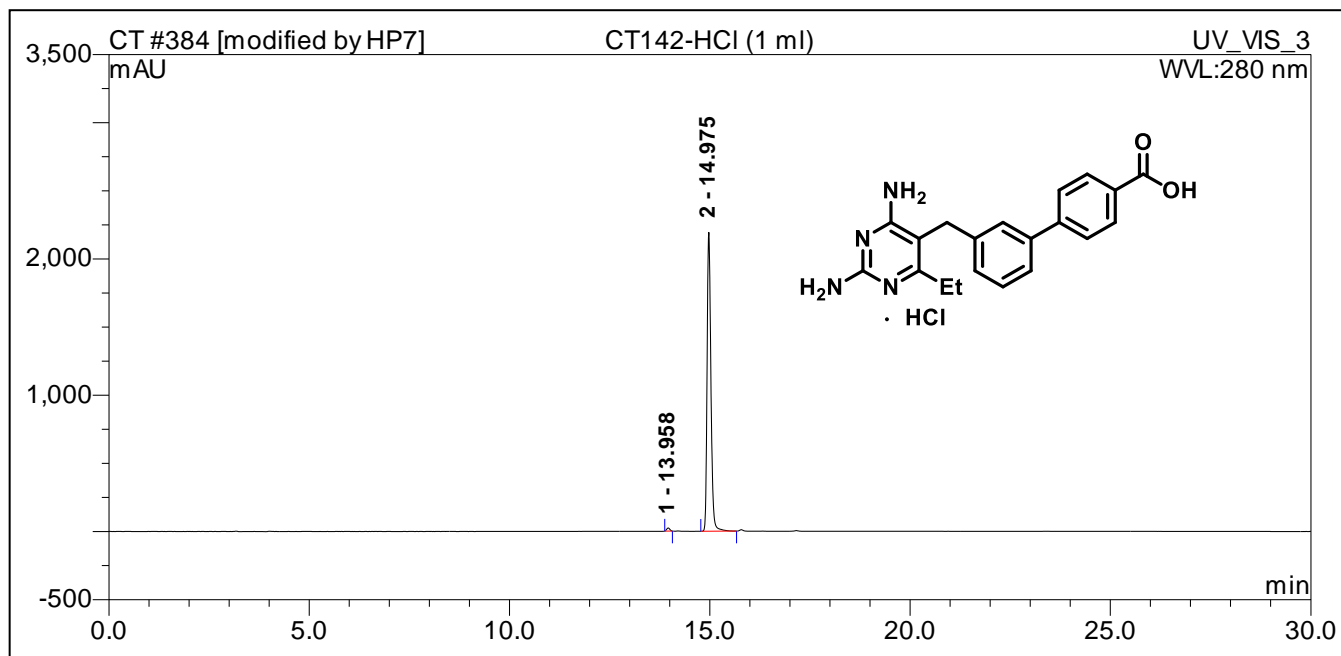

**384 CT142-HCl (1 ml)**

|                         |                                                   |                          |                 |
|-------------------------|---------------------------------------------------|--------------------------|-----------------|
| <i>Sample Name:</i>     | <b>CT142-HCl (1 ml)</b>                           | <i>Injection Volume:</i> | <b>2.0</b>      |
| <i>Vial Number:</i>     | <b>RE1</b>                                        | <i>Channel:</i>          | <b>UV_VIS_3</b> |
| <i>Sample Type:</i>     | <b>unknown</b>                                    | <i>Wavelength:</i>       | <b>280.0</b>    |
| <i>Control Program:</i> | <b>15-60_30min_AB_flow 0-6_column B (1-2_6-1)</b> | <i>Bandwidth:</i>        | <b>1</b>        |
| <i>Quantif. Method:</i> | <b>Standard CALIBRATION</b>                       | <i>Dilution Factor:</i>  | <b>1.0000</b>   |
| <i>Recording Time:</i>  | <b>12/8/2021 21:53</b>                            | <i>Sample Weight:</i>    | <b>1.0000</b>   |
| <i>Run Time (min):</i>  | <b>30.01</b>                                      | <i>Sample Amount:</i>    | <b>1.0000</b>   |

| No.           | Ret.Time<br>min | Peak Name | Height<br>mAU | Area<br>mAU*min | Rel.Area<br>% | Amount<br>ng | Type |
|---------------|-----------------|-----------|---------------|-----------------|---------------|--------------|------|
| 1             | 13.96           | na        | 22.608        | 2.065           | 0.84          | n.a.         | BMB* |
| 2             | 14.98           | na        | 2193.459      | 242.824         | 99.16         | n.a.         | BMB  |
| <b>Total:</b> |                 |           | 2216.067      | 244.889         | 100.00        | 0.000        |      |

**Figure S22.** HPLC profile of compound 6-HCl.

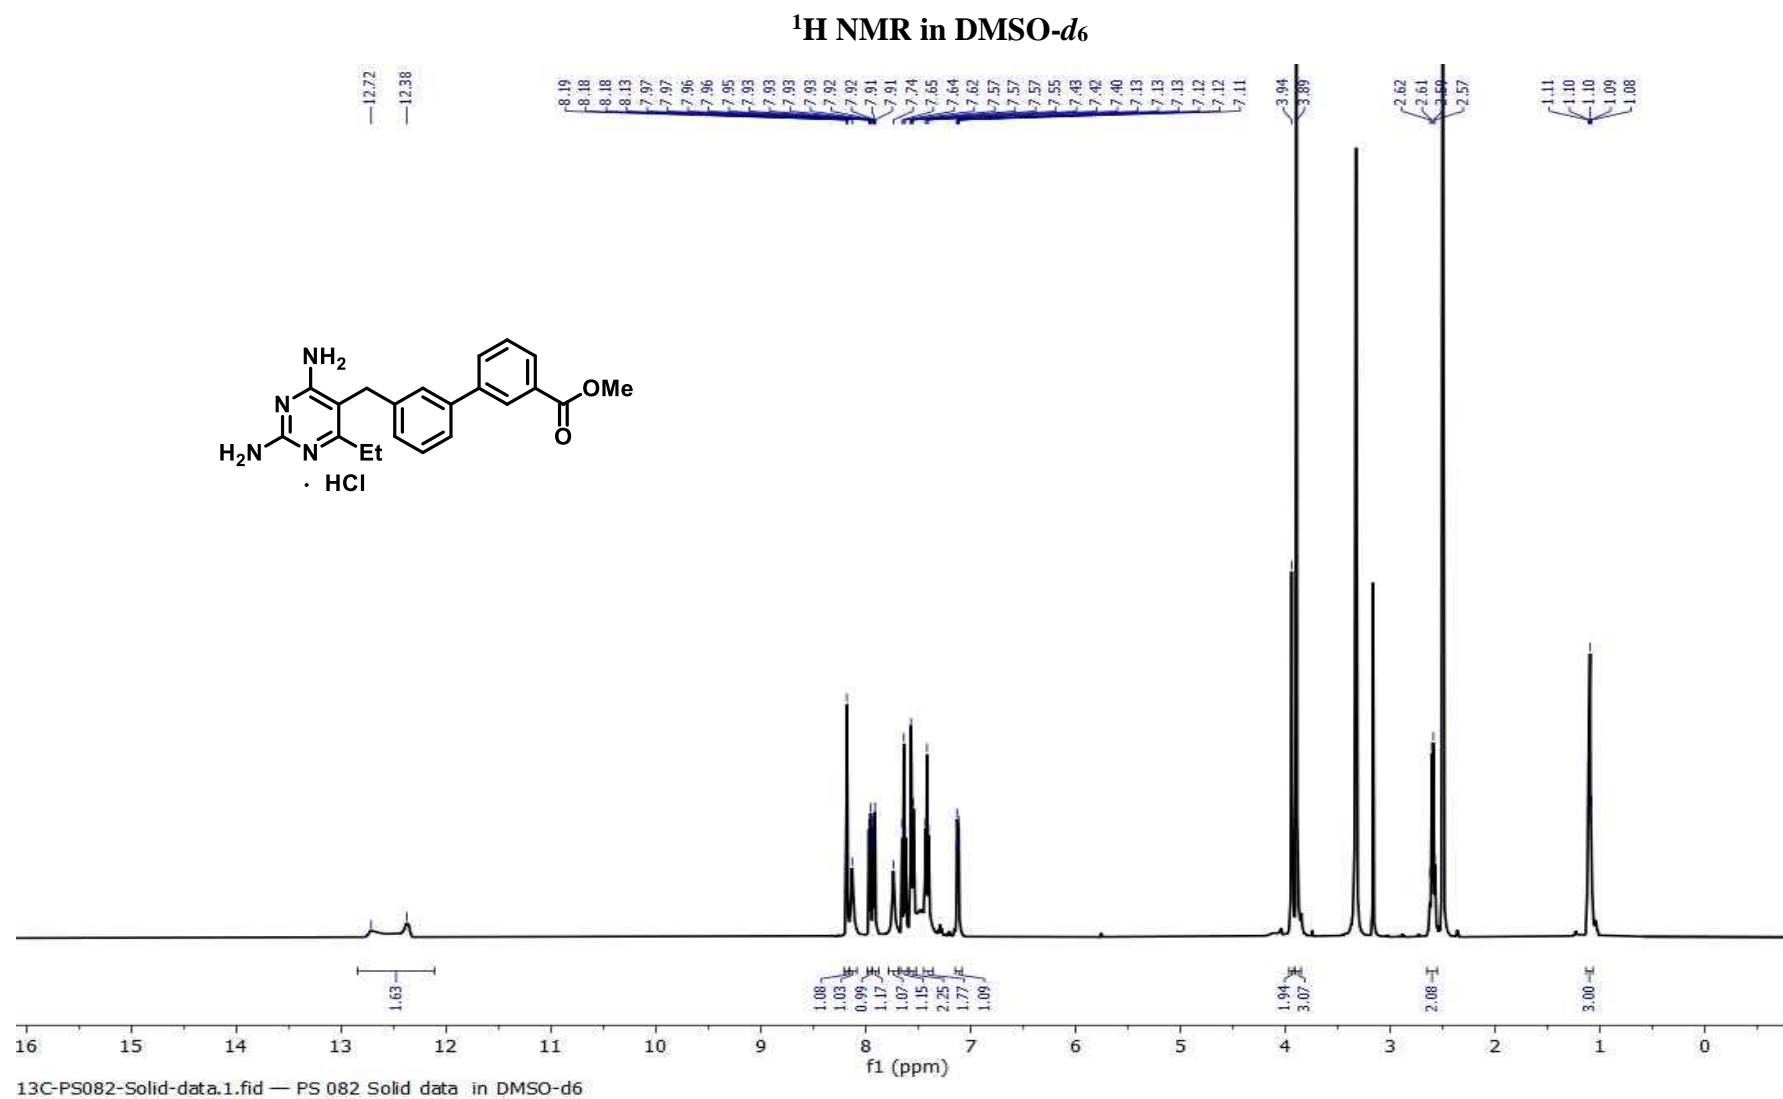

**Figure S23.**  $^1\text{H}$  NMR spectra of compound 7-HCl.



<sup>13</sup>C NMR in DMSO-*d*<sub>6</sub>

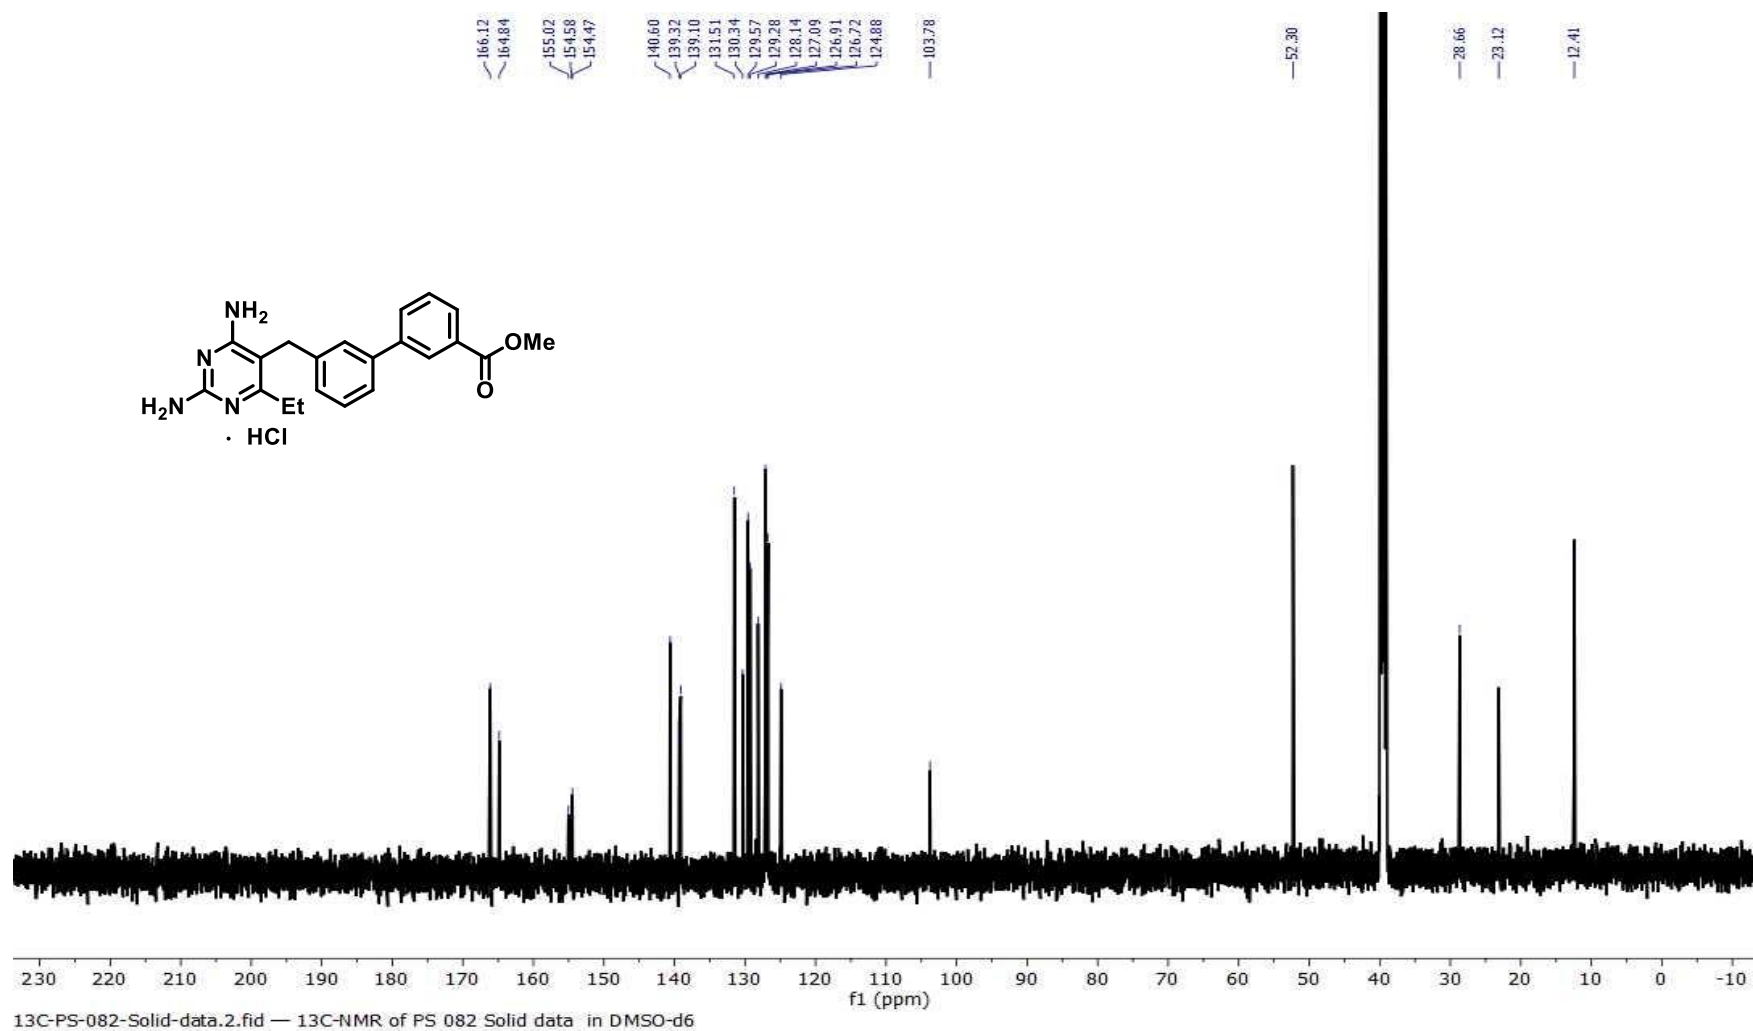

Figure S24. <sup>13</sup>C NMR spectra of compound 7-HCl.

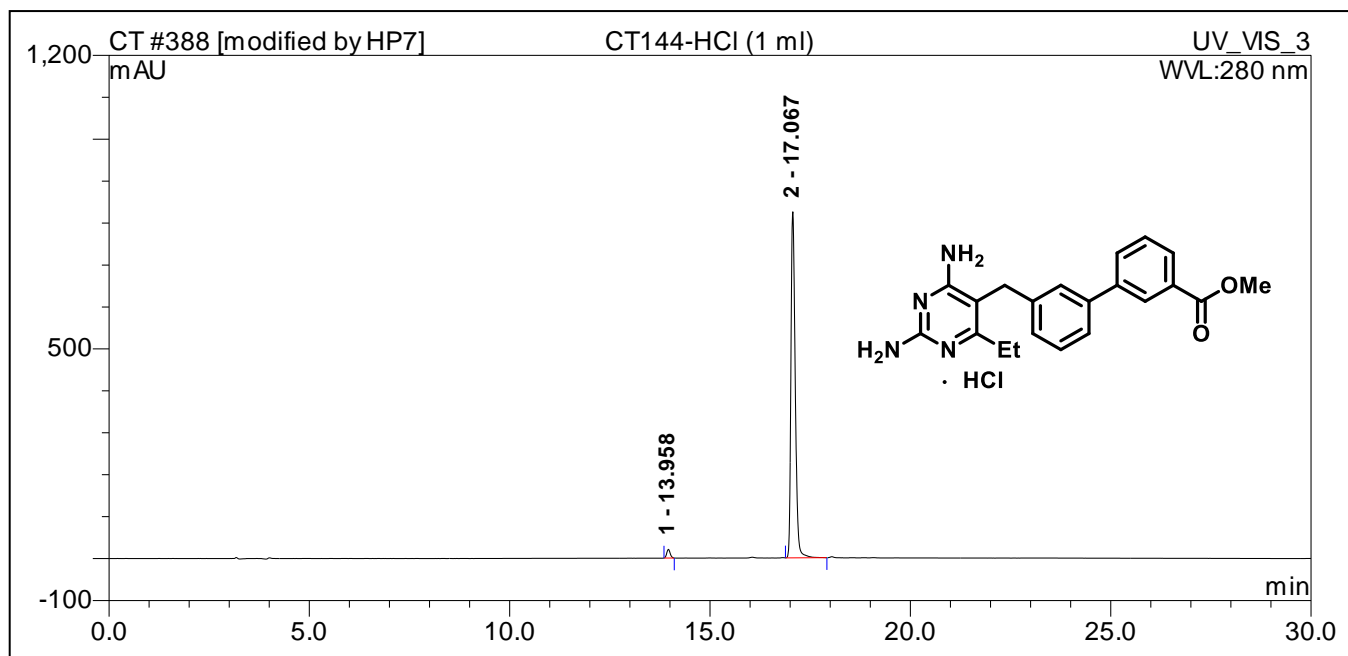

**388 CT144-HCl (1 ml)**

|                  |                                            |                   |          |
|------------------|--------------------------------------------|-------------------|----------|
| Sample Name:     | CT144-HCl (1 ml)                           | Injection Volume: | 2.0      |
| Vial Number:     | RE3                                        | Channel:          | UV_VIS_3 |
| Sample Type:     | unknown                                    | Wavelength:       | 280.0    |
| Control Program: | 15-60_30min_AB_flow 0-6_column B (1-2_6-1) | Bandwidth:        | 1        |
| Quantif. Method: | Standard CALIBRATION                       | Dilution Factor:  | 1.0000   |
| Recording Time:  | 12/8/2021 23:06                            | Sample Weight:    | 1.0000   |
| Run Time (min):  | 30.00                                      | Sample Amount:    | 1.0000   |

| No.           | Ret.Time<br>min | Peak Name | Height<br>mAU | Area<br>mAU*min | Rel.Area<br>% | Amount<br>ng | Type |
|---------------|-----------------|-----------|---------------|-----------------|---------------|--------------|------|
| 1             | 13.96           | na        | 20.513        | 2.037           | 1.94          | n.a.         | BMB* |
| 2             | 17.07           | na        | 825.330       | 102.974         | 98.06         | n.a.         | BMB  |
| <b>Total:</b> |                 |           | 845.843       | 105.011         | 100.00        | 0.000        |      |

Figure S25. HPLC profile of compound 7-HCl.

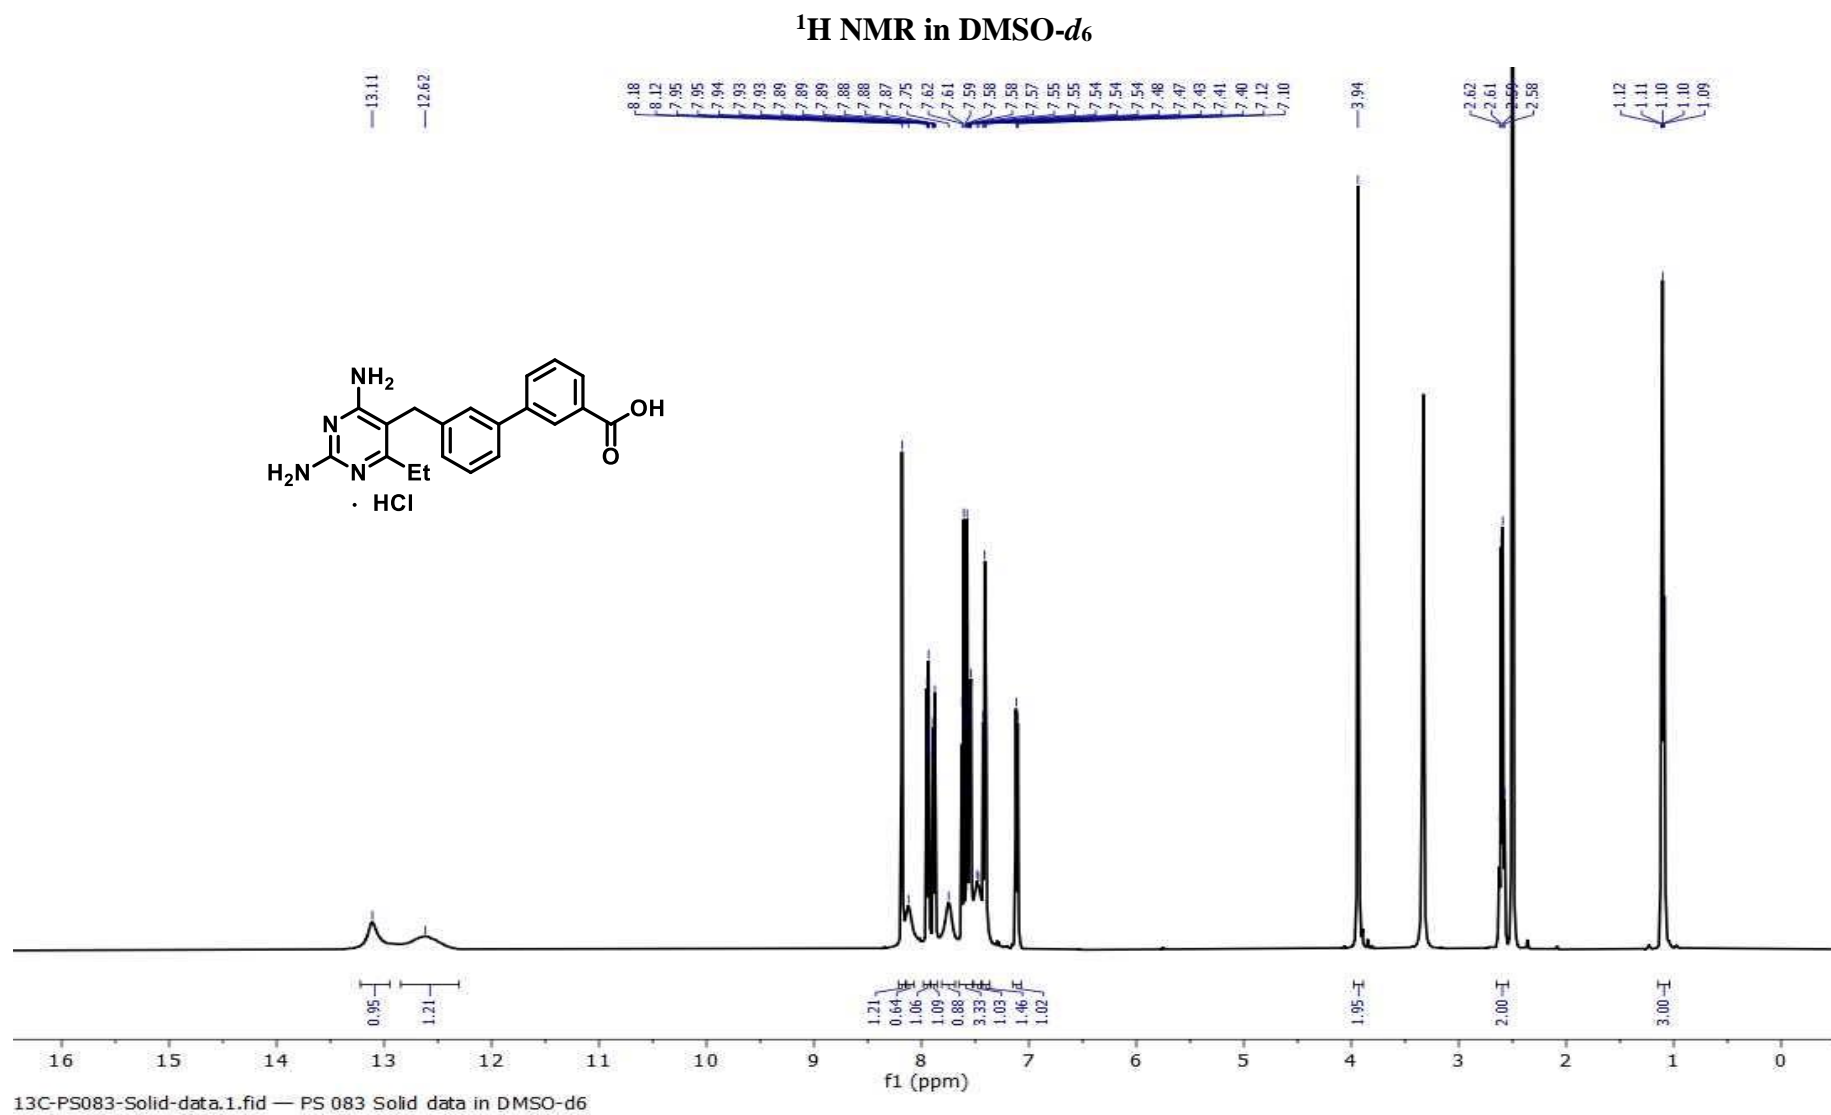

**Figure S26.** <sup>1</sup>H NMR spectra of compound 8-HCl.

<sup>13</sup>C NMR in DMSO-*d*<sub>6</sub>

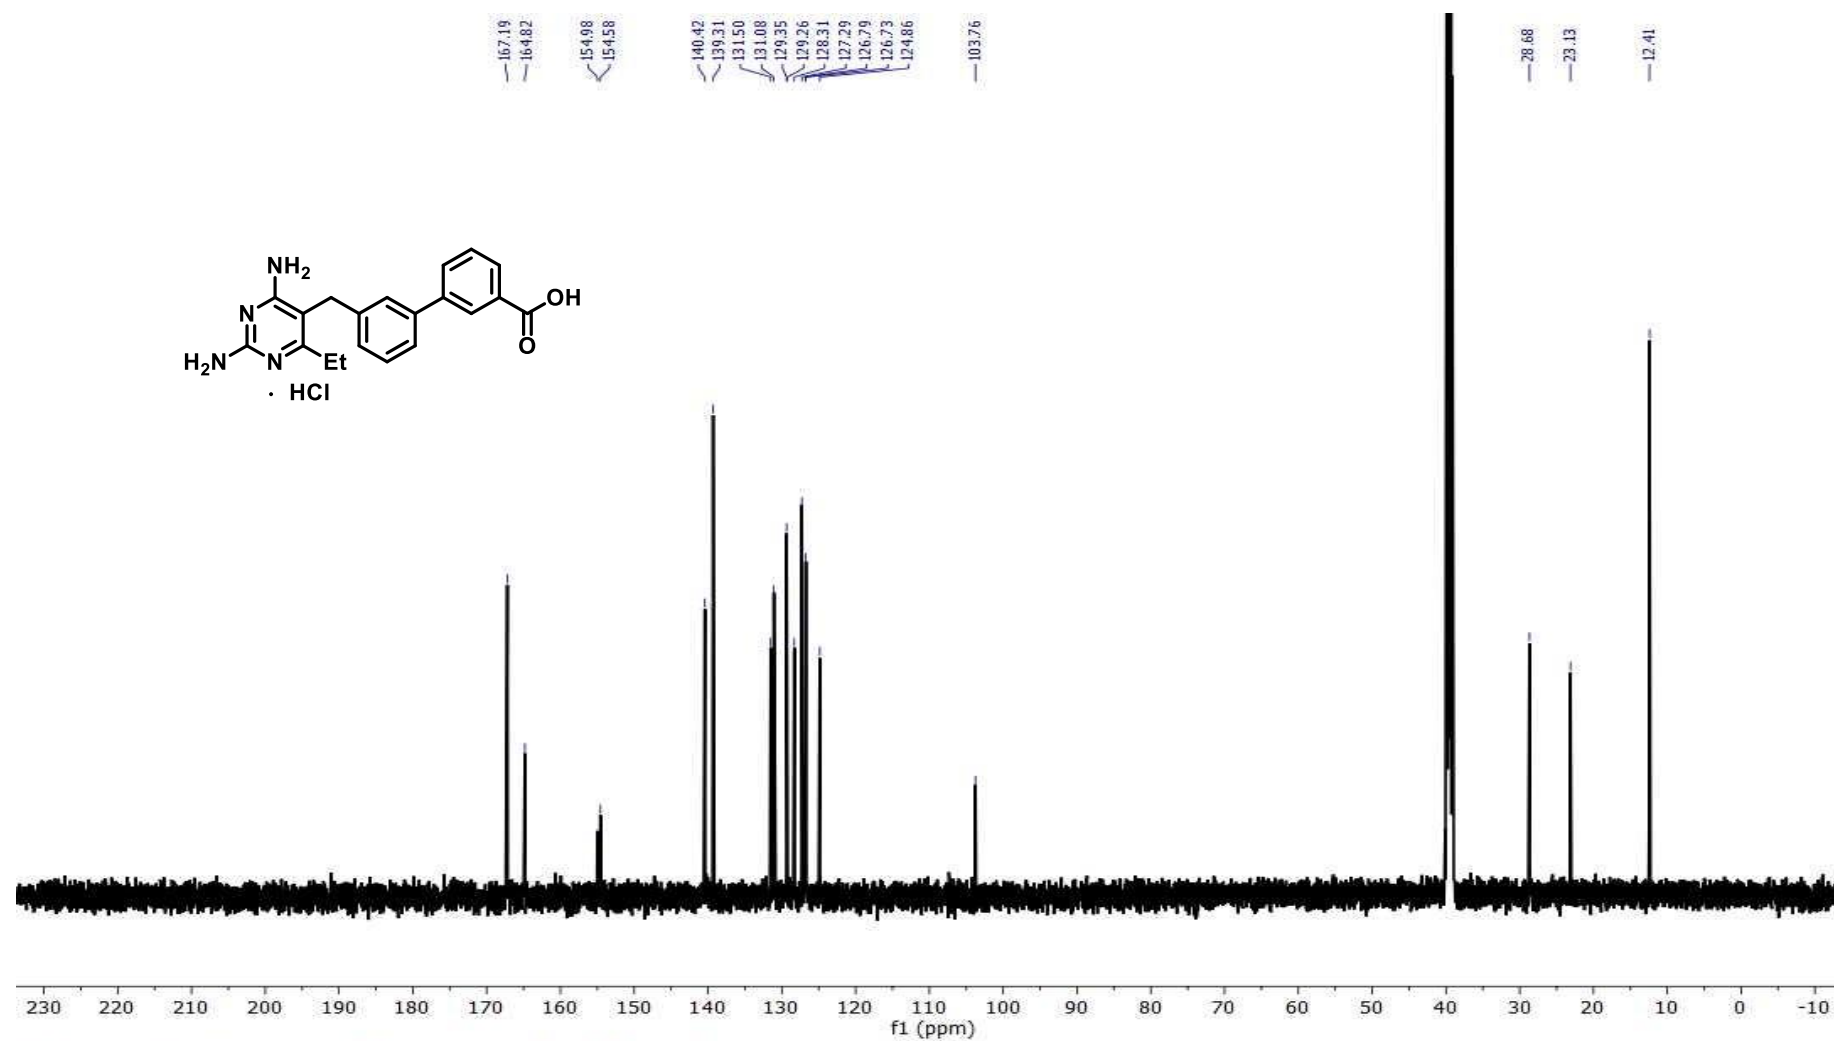

**Figure S27.** <sup>13</sup>C NMR spectra of compound 8-HCl.

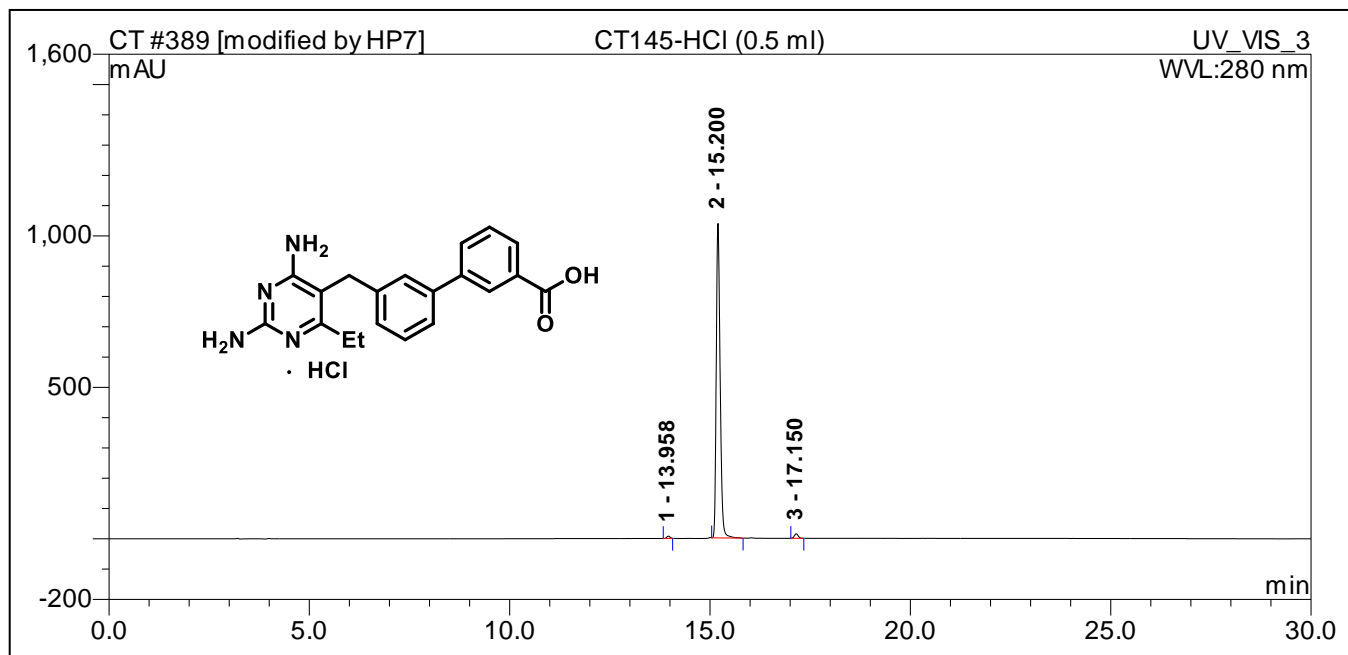

**389 CT145-HCl (0.5 ml)**

|                         |                                                   |                          |                 |
|-------------------------|---------------------------------------------------|--------------------------|-----------------|
| <i>Sample Name:</i>     | <b>CT145-HCl (0.5 ml)</b>                         | <i>Injection Volume:</i> | <b>1.0</b>      |
| <i>Vial Number:</i>     | <b>RE4</b>                                        | <i>Channel:</i>          | <b>UV_VIS_3</b> |
| <i>Sample Type:</i>     | <b>unknown</b>                                    | <i>Wavelength:</i>       | <b>280.0</b>    |
| <i>Control Program:</i> | <b>15-60_30min_AB_flow 0-6_column B (1-2_6-1)</b> | <i>Bandwidth:</i>        | <b>1</b>        |
| <i>Quantif. Method:</i> | <b>Standard CALIBRATION</b>                       | <i>Dilution Factor:</i>  | <b>1.0000</b>   |
| <i>Recording Time:</i>  | <b>12/8/2021 23:42</b>                            | <i>Sample Weight:</i>    | <b>1.0000</b>   |
| <i>Run Time (min):</i>  | <b>30.00</b>                                      | <i>Sample Amount:</i>    | <b>1.0000</b>   |

| No.           | Ret.Time<br>min | Peak Name | Height<br>mAU | Area<br>mAU*min | Rel.Area<br>% | Amount<br>ng | Type |
|---------------|-----------------|-----------|---------------|-----------------|---------------|--------------|------|
| 1             | 13.96           | na        | 7.565         | 0.720           | 0.60          | n.a.         | BMB* |
| 2             | 15.20           | na        | 1037.876      | 116.663         | 97.99         | n.a.         | BMB  |
| 3             | 17.15           | na        | 14.746        | 1.674           | 1.41          | n.a.         | BMB* |
| <b>Total:</b> |                 |           | 1060.187      | 119.058         | 100.00        | 0.000        |      |

Figure S28. HPLC profile of compound 8-HCl.
